# Supplementary material for: ahctf1 and kras mutations combine to amplify oncogenic stress and restrict liver overgrowth in a zebrafish model of hepatocellular carcinoma
Source: eLife. 2023 Jan 17;12:e73407. doi: 10.7554/eLife.73407 (PMC9897728; doi:10.7554/eLife.73407)
Supplement: Figure 1—source data 1. — Figure 1d: Liver volume [µm3] of 2-CLiP and TO(krasG12V)T/+ zebrafish larvae; role of ahctf1 genotype. Figure 1e: Liver/body mass ratio (%) of adult male and female TO(krasG12V)T/+ zebrafish with and without dox treatment: role of ahctf1 genotype. [file elife-73407-fig1-data1.xlsx]

## Sheet: Sheet1
Figure 1b Source Data			Figure 1d Source Data					Figure 1e Source Data
mRNA epression relative to WT			Liver volume [µm3]					Liver / Body mass (%)
ahctf1+/+; TO(kras)T/+	ahctf1+/-; TO(kras)T/+		ahctf1+/+; 2-CLiP	ahctf1+/-; 2-CLiP	ahctf1+/+; TO(kras)T/+	ahctf1+/-; TO(kras)T/+		ahctf1+/+; TO(kras)T/+ no doxycycline male	ahctf1+/-; TO(kras)T/+ no doxycycline male	ahctf1+/+; TO(kras)T/+ doxycycline male	ahctf1+/-; TO(kras)T/+ doxycycline male	ahctf1+/+; TO(kras)T/+ no doxycycline female	ahctf1+/-; TO(kras)T/+ no doxycycline female	ahctf1+/+; TO(kras)T/+ doxycycline female	ahctf1+/-; TO(kras)T/+ doxycycline female
1.08175	0.515822		2.30798e+06	1.99552e+06	7548541	6634009		1.2139	1.18958	11.8757	9.33181	1.57553	1.26036	11.3916	7.18851
0.953908	0.479374		1.80256e+06	1.51471e+06	7450843	5817433		1.9809	1.52107	13.2168	12.1096	1.569	0.98273	9.83587	8.31611
0.964346	0.567869		1.60789e+06	1.92588e+06	7335798	5195157		1.37635	1.72284	14.9363	10.5389	1.57202	1.54139	10.4545	7.50151
			1.67934e+06	1.7592e+06	7468042	6419737		1.3582	1.12502	12.911	10.2125	1.54743	1.89811	14.4418	5.81332
			2.17938e+06	2.49918e+06	7631408	6357397		1.35764	1.32739	13.462	8.42814	1.39134	1.78367	11.6909	7.80837
			2.30106e+06	1.77447e+06	8263119	5387886		1.16312	1.26526	11.0607	10.1237	1.54267	1.64729	7.86408	5.40007
			1.74926e+06	2.09446e+06	7694292	6102470		1.44455	1.7631	12.0326	10.7068	1.70662	1.34274	10.9848	6.73979
			1.98132e+06	2.18707e+06	7939173	5701006		1.66882	1.03959	12.1515	7.38988	1.2988	1.58777	12.9969	9.88417
			2.13779e+06	1.93642e+06	8344499	6098483		1.33378	1.12852	14.2	7.29071	1.37589	1.80611	9.14865	8.10624
			2.09469e+06	1.84279e+06	8970115	6048665		1.60386	1.30219	14.2865	8.20498	1.1269	1.04862	8.20449	6.62808
			2.20325e+06	2.00069e+06	8649022	5916542
			2.00898e+06	2.36006e+06	8133958	5730339
			1.51056e+06	1.92292e+06	8846296	6161403
			2.30292e+06	2.00455e+06	7571758	5618720
			1.83428e+06	1.65356e+06	7379660	5410709
			1.88708e+06	2.18524e+06	7154088	6312775
			1.56687e+06	2.00963e+06	8512101	6341034
			1.82135e+06	2.38922e+06	7860536	5953172
			1.45609e+06	2.40317e+06	8080023	5616183
			2.34934e+06	1.97331e+06	8525205	5479684
			1.98432e+06	2.20113e+06
			2.17592e+06	1.5638e+06
			2.2387e+06	2.28935e+06
			1.74109e+06	2.09656e+06
			2.25401e+06	1.8767e+06
			2.0862e+06	1.90333e+06
			1.82784e+06
			1.43363e+06
			2.04237e+06
			1.9158e+06
