# Supplementary material for: ahctf1 and kras mutations combine to amplify oncogenic stress and restrict liver overgrowth in a zebrafish model of hepatocellular carcinoma
Source: eLife. 2023 Jan 17;12:e73407. doi: 10.7554/eLife.73407 (PMC9897728; doi:10.7554/eLife.73407)
Supplement: Figure 2—source data 1. — Figure 2d: Abundance of nuclear pores per µm2 in livers of dox-treated TO(krasG12V)T/+ zebrafish larvae; role of ahctf1 genotype. Figure 2e: Mean volume of nuclei per µm3 in dox-treated livers of TO(krasG12V)T/+ zebrafish larvae; role of ahctf1 genotype. [file elife-73407-fig2-data1.xlsx]

## Sheet: Sheet1
Figure 2b Source Data					Figure 2d Source Data					Figure 2e Source Data
mAb414 nuclear / cytoplasmic intensity					Nuclear pores / µm2					Mean nuclear volume [µm3]
ahctf1+/+; TO(kras)+/+	ahctf1+/-; TO(kras)+/+	ahctf1+/+; TO(kras)T/+	ahctf1+/-; TO(kras)T/+		ahctf1+/+; TO(kras)+/+	ahctf1+/-; TO(kras)+/+	ahctf1+/+; TO(kras)T/+	ahctf1+/-; TO(kras)T/+		ahctf1+/+; TO(kras)+/+	ahctf1+/-; TO(kras)+/+	ahctf1+/+; TO(kras)T/+	ahctf1+/-; TO(kras)T/+
1.14	1.42	3.2	0.93		2.43141	2.0667	3.24189	3.03927		67.8	60.13	100.94	76.93
1.33	1.38	1.96	0.95		2.2288	2.9177	4.01183	3.56607		70.26	62.16	74.24	95.29
1.16	0.99	2.35	1.09		2.2288	2.35037	4.09288	3.20136		71.2	65.19	78.31	109.08
1.28	1.04	1.45	1.14		2.30984	2.47194	4.70073	3.03927		72.61	67.62	78.74	112.45
1.15	1.41	2.2	1.2		2.30984	2.47194	3.28241	2.79613		81.22	68.96	79.87	88.37
1.3	1.41	1.38	1.22		2.59351	2.30984	3.6066	3.32293		82.29	69.67	83.34	103.87
1	0.97	1.66	1.24		2.47194	2.39089	4.2955	2.83665		87.03	73.98	83.62	99.35
1.38	0.97	1.75	1.24		2.30984	2.35037	3.52555	2.55298		79.49	75.03	87.42	79.58
1.13	1.24	1.68	1.28		2.67456	2.39089	3.20136	3.16084		62.4	79.77	88.1	90.19
1.58	1.14	1.54	1.28		2.18827	2.2288	3.4445	3.48503		83.28	80.55	98.24	104.43
1.54	1.14	1.6	1.34		2.47194	2.30984	3.76869	3.12031		84.4	80.58	88.95	94.42
1.32	1.28	1.83	1.36		2.2288	2.55298	3.56607	3.4445		65.62	80.77	97.72	85.49
1.35	1.19	1.85	1.36		2.51246	2.79613	3.64712	3.68764		88.82	81.76	89.89	106.35
1.23	1.27	1.91	1.39		2.35037	2.47194	3.40398	3.4445		89.74	98.29	90.02	74.22
1.14	1.03	1.97	1.41		2.55298	2.7556	3.24189	3.52555		75.34	85.73	91.09	84.72
1.2	1.11	2.17	1.42		2.59351	2.83665	3.84974	2.9177		94.36	86.89	91.13	102.73
1.32	1.1	3.11	1.43		2.2288	2.51246	3.84974	3.40398		97.61	87.28	91.43	99.05
1.03	1.26	1.7	1.43		2.67456	2.14775	4.41707	3.28241		103.21	90.97	92.72	103.02
	1.4	1.47	1.47		2.47194	2.55298	3.80922	3.24189			92.42	96.02	103.42
	1.27	2.06	1.47		2.83665	2.59351	4.2955	2.95822			106.37	93.8	115.4
		1.85	1.48		2.0667	2.43141	3.56607	2.14775				94.6	78.41
		1.96	1.51		2.0667	2.7556	4.61969	3.4445				94.86	100.07
		1.63	1.57		2.95822	2.63403	3.48503	3.24189				95.62	94.26
		1.37	1.58		2.55298	2.35037	3.56607	3.28241				98.9	84.66
		1.97	1.63		2.67456	2.67456	3.52555	3.32293				99.95	85.87
		2.76	1.63				4.1334	3.03927				100.18	82.29
		1.71	1.66				3.68764	3.12031				102.11	96.48
		2	1.67				4.66021	2.55298				103.35	84.31
		1.63	1.74				4.17393	2.83665				104.62	88.98
		1.73	1.76				3.89026	2.95822				105.05	77.03
		1.91	1.77				3.52555	3.24189				106.35	77.75
		2.01	1.79				4.05236	3.32293				106.95	112.01
		1.98	1.81				4.45759	2.59351				107.12	74.29
		2.2	1.82				4.17393	2.7556				108.11	81.18
		2.05	1.83				4.90335	3.28241				109.37	85.68
		2.99	1.84									109.56	87.54
		1.71	1.87									110.54	89.69
		2.97	1.88									110.54	87.28
		2.26	1.88									110.94	83.29
		2.11	1.92									114.49	100.63
		1.82	1.97									114.56	79.1
		1.94	1.98									115.63	106.16
		1.9	1.99									115.64	82.75
		2.27	2.08									122.66	82.4
		2.22	2.11									116.37	73.58
		1.71	2.13									116.41	91.21
		2.93	2.13									118.31	95.33
		2.25	2.22									118.82	78.56
		2.78	2.28									119.21	112.23
		2.55	2.37									119.21	79.84
		2.2	2.38									121.47	108.39
		2.18										124.44
		1.98										124.91
		2.32										125.68
		2.33										128.2
		2										129.08
		2.39										120.05
		2.25										111.72
		2.57										101.72
		2.24										92.18
		3.22										85.6
		2.08										98.41
		1.25										109.9
