# Supplementary material for: ahctf1 and kras mutations combine to amplify oncogenic stress and restrict liver overgrowth in a zebrafish model of hepatocellular carcinoma
Source: eLife. 2023 Jan 17;12:e73407. doi: 10.7554/eLife.73407 (PMC9897728; doi:10.7554/eLife.73407)
Supplement: Figure 3—source data 1. — Figure 3d: Percentage of mitotic cells expressing an aberrant phenotype in livers of TO(krasG12V)T/+ zebrafish larvae; role of ahctf1 genotype. [file elife-73407-fig3-data1.xlsx]

## Sheet: Sheet1
Figure 3c Source Data						Figure 3d Source Data
Number of mitotic cells						Percentage mitotic cells
	Prometaphase	Metaphase	Anaphase	Cytokinesis			Typical	Multipolar	Misaligned	Bridge
ahctf1+/+; TO(kras)T/+	62	57	29	18		ahctf1+/+; TO(kras)T/+ metaphase	100	0	0	0
ahctf1+/-; TO(kras)T/+	63	58	32	11		ahctf1+/-; TO(kras)T/+ metaphase	48.2759	24.1379	27.5862	0
						ahctf1+/+; TO(kras)T/+ anaphase	100	0	0	0
						ahctf1+/-; TO(kras)T/+ anaphase	53.125	0	0	46.875
