# Supplementary material for: ahctf1 and kras mutations combine to amplify oncogenic stress and restrict liver overgrowth in a zebrafish model of hepatocellular carcinoma
Source: eLife. 2023 Jan 17;12:e73407. doi: 10.7554/eLife.73407 (PMC9897728; doi:10.7554/eLife.73407)
Supplement: Figure 4—source data 1. — Figure 4e: Quantitation of Tp53 protein intensity in western blots of lysates from TO(krasG12V)T/+ zebrafish larvae; role of ahctf1 genotype. Figure 4g: Quantitation of liver volume (µm3) of TO(krasG12V)T/+ zebrafish larvae; role of ahctf1 and tp53 mutation. [file elife-73407-fig4-data1.xlsx]

## Sheet: Sheet1
Figure 4c Source Data			Figure 4e Source Data			Figure 4g Source Data
Percentage γ-H2AX+ cells			Tp53 protein normalised to GAPDH			Liver volume [µm3]
ahctf1+/+; TO(kras)T/+	ahctf1+/-; TO(kras)T/+		ahctf1+/+; TO(kras)T/+	ahctf1+/-; TO(kras)T/+		ahctf1+/+; tp53+/+; TO(kras)T/+	ahctf1+/-; tp53+/+; TO(kras)T/+	ahctf1+/+; tp53m/m; TO(kras)T/+	ahctf1+/-; tp53m/m; TO(kras)T/+
0.72	4.26316		0.8731	3.2346		7.99866e+06	6346395	1.18376e+07	1.08126e+07
0	4.26316		1.0134	3.8969		7.75045e+06	5726807	1.26552e+07	8.76751e+06
0	4.3668		1.1135	3.6349		8.07832e+06	6441358	1.17634e+07	9.41258e+06
0	4.83871					7.75077e+06	6247102	1.20479e+07	9.56243e+06
0	5.09091					7.38287e+06	5697720	1.2715e+07	9.73249e+06
0.46	5.17241					7.02521e+06	5983922	1.24688e+07	9.86115e+06
0.53	5.35714					8.1401e+06	5654911	1.30603e+07	9.48106e+06
0.53	5.4112					7.31215e+06	5390239	1.20269e+07	1.03491e+07
0.56	5.49					7.48419e+06	5524051	1.22182e+07	1.0259e+07
0.68	5.69068					8.27163e+06	5105221	1.31392e+07	9.81282e+06
0.72	5.69565					8.55119e+06	6170619	1.27238e+07	8.9164e+06
0.82	5.71698					7.51975e+06	5954773	1.17092e+07	8.83178e+06
0.86	5.7971					7.87827e+06	5927811	1.25362e+07	1.02569e+07
0.95	5.95238					8.20965e+06	5852435	1.34427e+07	9.4881e+06
0.96	6					8.05538e+06	5444171	1.31405e+07	1.02214e+07
0.96	6.10204					8.23678e+06	5854499	1.21962e+07	1.03273e+07
1	6.18598					7.6964e+06	5715774	1.16834e+07	8.90602e+06
1	6.25					7.48663e+06	6214553	1.35895e+07	1.03267e+07
1.03	6.46269					8.24065e+06	5130448	1.21912e+07	1.00782e+07
1.04	6.57895					8232905	5265467	1.37095e+07	1.02548e+07
1.12	6.67742					7.57837e+06	5001384	1.22444e+07	9.5615e+06
1.26	6.81818					7.97048e+06	5800909	1.232e+07	1.09868e+07
1.58	6.89474					7.47177e+06	4840842	1.25398e+07	8.86924e+06
1.32	7.09819					7.84674e+06	5963132	1.22775e+07	1.06974e+07
2.02	7.2619					7.26126e+06	5982893	1.19858e+07
1.82	5.40741					7.31944e+06	5351235	1.33297e+07
1.42	7.50538					7.61289e+06		1.2177e+07
1.45	7.55					8.24972e+06		1.30142e+07
1.64	7.79221					7.94414e+06
2.22	7.93651
2.6	8.1954
	8.47535
	8.84615
	5.25926
	6.31166
	5.47115
