# Supplementary material for: ahctf1 and kras mutations combine to amplify oncogenic stress and restrict liver overgrowth in a zebrafish model of hepatocellular carcinoma
Source: eLife. 2023 Jan 17;12:e73407. doi: 10.7554/eLife.73407 (PMC9897728; doi:10.7554/eLife.73407)
Supplement: Figure 5—source data 1. — Figure 5c: Multiple mRNA expression analyses by RT-quantitative PCR (RT-qPCR) of micro-dissected livers from dox-treated TO(krasG12V)T/+ zebrafish larvae; role of ahctf1 and tp53 mutation. [file elife-73407-fig5-data1.xlsx]

## Sheet: Sheet1
Figure 5b Source Data					Figure 5c Source Data
Annexin 5/ liver volume [µm3]					mdm2 mRNA expression relative to WT
ahctf1+/+; tp53+/+; TO(kras)T/+	ahctf1+/-; tp53+/+; TO(kras)T/+	ahctf1+/+; tp53m/m; TO(kras)T/+	ahctf1+/-; tp53m/m; TO(kras)T/+		ahctf1+/+; tp53+/+; TO(kras)T/+	ahctf1+/-; tp53+/+; TO(kras)T/+	ahctf1+/+; tp53m/m; TO(kras)T/+	ahctf1+/-; tp53m/m; TO(kras)T/+
1.75562e-05	4.33636e-05	4.61071e-07	3.51134e-05		0.850379	4.70497	1.47386	1.63217
1.26393e-05	2.89474e-05	2.26482e-06	1.09773e-05		1.12041	4.48555	1.51719	1.53283
5.09426e-06	3.01608e-05	1.69679e-06	1.23517e-05		1.02921	4.86355	1.64979	1.44233
9.33556e-06	5.53953e-05	6.62343e-07	2.89034e-05		pmaip1 mRNA expression relative to WT
1.37102e-05	6.61858e-05	1.01738e-06	9.53922e-06		ahctf1+/+; tp53+/+; TO(kras)T/+	ahctf1+/-; tp53+/+; TO(kras)T/+	ahctf1+/+; tp53m/m; TO(kras)T/+	ahctf1+/-; tp53m/m; TO(kras)T/+
1.60639e-05	5.7429e-05	1.95878e-06	2.23636e-05		1.04906	6.4667	0.545471	1.48785
2.0363e-05	5.38897e-05	0	1.70173e-05		1.06619	6.62018	0.387657	1.36555
1.36439e-05	5.43519e-05	0	3.88144e-05		0.884754	7.09215	0.469072	1.59708
1.50248e-05	6.33874e-05	0	2.99462e-05		bbc3 mRNA expression relative to WT
2.39745e-05	4.89912e-05	0	2.20739e-05		ahctf1+/+; tp53+/+; TO(kras)T/+	ahctf1+/-; tp53+/+; TO(kras)T/+	ahctf1+/+; tp53m/m; TO(kras)T/+	ahctf1+/-; tp53m/m; TO(kras)T/+
1.44688e-05	4.30093e-05	1.2427e-06	2.41992e-05		1.07294	6.8688	0.448989	1.8132
1.443e-05	5.2281e-05	1.93137e-06			1.02237	6.30281	0.373979	1.95054
	7.47744e-05	1.23764e-06			0.90469	6.66835	0.356813	1.6162
		2.48264e-06			bim mRNA expression relative to WT
		2.66834e-06			ahctf1+/+; tp53+/+; TO(kras)T/+	ahctf1+/-; tp53+/+; TO(kras)T/+	ahctf1+/+; tp53m/m; TO(kras)T/+	ahctf1+/-; tp53m/m; TO(kras)T/+
		3.10479e-06			0.923558	3.75806	0.504909	2.28661
					1.13532	4.0224	0.00649713	1.97052
					0.941121	3.6307	0.452225	2.06231
					bid mRNA expression relative to WT
					ahctf1+/+; tp53+/+; TO(kras)T/+	ahctf1+/-; tp53+/+; TO(kras)T/+	ahctf1+/+; tp53m/m; TO(kras)T/+	ahctf1+/-; tp53m/m; TO(kras)T/+
					0.893733	3.03911	0.693357	1.59563
					1.12302	2.74339	0.73979	1.57689
					0.983251	2.95149	0.725172	1.66036
					bik mRNA expression relative to WT
					ahctf1+/+; tp53+/+; TO(kras)T/+	ahctf1+/-; tp53+/+; TO(kras)T/+	ahctf1+/+; tp53m/m; TO(kras)T/+	ahctf1+/-; tp53m/m; TO(kras)T/+
					0.893456	2.65499	0.538163	1.56952
					1.10996	2.70667	0.558404	1.61073
					0.996583	2.99346	0.684965	1.72323
					bad mRNA expression relative to WT
					ahctf1+/+; tp53+/+; TO(kras)T/+	ahctf1+/-; tp53+/+; TO(kras)T/+	ahctf1+/+; tp53m/m; TO(kras)T/+	ahctf1+/-; tp53m/m; TO(kras)T/+
					0.878137	2.49561	0.618237	1.59788
					1.26386	2.38721	0.546672	1.56366
					0.857998	2.4634	0.570002	1.71324
					bcl2 mRNA expression relative to WT
					ahctf1+/+; tp53+/+; TO(kras)T/+	ahctf1+/-; tp53+/+; TO(kras)T/+	ahctf1+/+; tp53m/m; TO(kras)T/+	ahctf1+/-; tp53m/m; TO(kras)T/+
					1.11985	0.187092	1.46847	0.456249
					1.01455	0.221939	1.48974	0.51357
					0.865604	0.260941	1.39168	0.563681
					bclxl mRNA expression relative to WT
					ahctf1+/+; tp53+/+; TO(kras)T/+	ahctf1+/-; tp53+/+; TO(kras)T/+	ahctf1+/+; tp53m/m; TO(kras)T/+	ahctf1+/-; tp53m/m; TO(kras)T/+
					0.814122	0.237339	1.38161	0.546517
					1.02525	0.261368	1.44798	0.507822
					1.16062	0.333799	1.42318	0.450674
					bax mRNA expression relative to WT
					ahctf1+/+; tp53+/+; TO(kras)T/+	ahctf1+/-; tp53+/+; TO(kras)T/+	ahctf1+/+; tp53m/m; TO(kras)T/+	ahctf1+/-; tp53m/m; TO(kras)T/+
					0.934055	2.88319	0.422117	2.24692
					1.0272	3.32693	0.344627	2.24353
					1.03874	3.08061	0.377914	2.36096
