# Supplementary material for: ahctf1 and kras mutations combine to amplify oncogenic stress and restrict liver overgrowth in a zebrafish model of hepatocellular carcinoma
Source: eLife. 2023 Jan 17;12:e73407. doi: 10.7554/eLife.73407 (PMC9897728; doi:10.7554/eLife.73407)
Supplement: Figure 6—source data 1. — Figure 6e: p63 and p73 mRNA expression analyses by RT-qPCR of micro-dissected livers from doxycycline (dox)-treated TO(krasG12V) T/+ zebrafish larvae; role of ahctf1 and tp53 mutation. [file elife-73407-fig6-data1.xlsx]

## Sheet: Sheet1
Figure 6b Source Data					Figure 6c Source Data					Figure 6d Source Data					Figure 6e Source Data
% EdU+ cells / Hoechst+ cells					Liver volume [µm3]					cdkn1a mRNA expression relative to WT					tp63 mRNA expression relative to WT
ahctf1+/+; tp53+/+; TO(kras)T/+	ahctf1+/-; tp53+/+; TO(kras)T/+	ahctf1+/+; tp53m/m; TO(kras)T/+	ahctf1+/-; tp53m/m; TO(kras)T/+		ahctf1+/+; tp53+/+; TO(kras)T/+	ahctf1+/-; tp53+/+; TO(kras)T/+	ahctf1+/+; tp53m/m; TO(kras)T/+	ahctf1+/-; tp53m/m; TO(kras)T/+		ahctf1+/+; tp53+/+; TO(kras)T/+	ahctf1+/-; tp53+/+; TO(kras)T/+	ahctf1+/+; tp53m/m; TO(kras)T/+	ahctf1+/-; tp53m/m; TO(kras)T/+		ahctf1+/+; tp53+/+; TO(kras)T/+	ahctf1+/-; tp53+/+; TO(kras)T/+	ahctf1+/+; tp53m/m; TO(kras)T/+	ahctf1+/-; tp53m/m; TO(kras)T/+
22.24	14.61	52.68	45.23		7.7192e+06	5.72784e+06	1.19377e+07	1.00869e+07		0.947108	3.09749	1.69902	2.16693		1.04901	2.96884	2.76511	3.86499
24.85	15.14	52.68	51.65		8.32747e+06	5.82184e+06	1.19241e+07	9.5517e+06		1.01478	2.90762	1.57643	2.00881		0.904016	3.00412	2.67179	4.11786
26.57	15.86	53.35	51.83		8.33743e+06	4.90427e+06	1.27411e+07	9.15058e+06		1.03812	2.93686	1.59965	2.13058		1.04698	3.16316	2.57862	3.77289
26.68	16.46	56.63	43.91		7929779	5.87239e+06	1.2661e+07	9.81611e+06		cdkn2a/b mRNA expression relative to WT					tp73 mRNA expression relative to WT
26.84	17.67	57.03	52.07		8.29922e+06	5.85017e+06	1.17419e+07	8.74216e+06		ahctf1+/+; tp53+/+; TO(kras)T/+	ahctf1+/-; tp53+/+; TO(kras)T/+	ahctf1+/+; tp53m/m; TO(kras)T/+	ahctf1+/-; tp53m/m; TO(kras)T/+		ahctf1+/+; tp53+/+; TO(kras)T/+	ahctf1+/-; tp53+/+; TO(kras)T/+	ahctf1+/+; tp53m/m; TO(kras)T/+	ahctf1+/-; tp53m/m; TO(kras)T/+
27.94	18.07	57.8	47.15		7.34498e+06	6.34651e+06	1.29919e+07	9.09314e+06		0.901386	2.54772	1.33222	1.38302		0.950017	2.18927	1.97451	3.68157
28.21	18.11	58.01	52.35		8.07622e+06	5.55464e+06	1.11281e+07	8.62992e+06		1.12731	2.78531	1.48905	1.52635		0.994095	2.22477	1.83794	3.61488
28.5	18.79	58.67	52.5		7.18736e+06	5.71859e+06	12680046	8.7706e+06		0.971303	2.51169	1.42876	1.43749		1.05589	2.36684	1.92349	3.56972
29.21	19.94	59.27	42.68		8.25697e+06	5.33605e+06	1.21885e+07	9.70844e+06
30.44	20.05	59.78	53.77		8.88237e+06	5.65126e+06	1.10002e+07	9.50472e+06
31.64	20.8	60.58	53.85		8.34799e+06	5.75028e+06	1.2404e+07	9.69198e+06
31.74	21.17	61.76	54.27		8.09771e+06	4.84242e+06	1.30098e+07	9243079
31.89	21.32	62.07	44.59		8.91327e+06	4.96013e+06	1.16455e+07	9.61857e+06
32.13	21.7	62.56	54.87		7.50689e+06	5.83292e+06	1.19406e+07	9.91791e+06
32.17	22.48	62.73	56		8.01115e+06	5.3633e+06	1.15897e+07	9.60615e+06
33.9	22.72	64.48	46.22		8.51758e+06	6.23853e+06	1.29254e+07	8.65321e+06
34.6	23.28	64.76	56.64		8.61865e+06	5.5909e+06	1.24227e+07	9.8808e+06
35.69	23.37	66.83	57.39		8.50479e+06		1.26321e+07	9.11232e+06
36.06	23.77	67.74	57.58		8.30641e+06		1.26553e+07	8.52094e+06
36.54	24.52	68.87	47.78		8.11794e+06		1.18701e+07
37.09	24.88	69.28	60.22		8.74227e+06		1.22448e+07
38.19	24.9	69.46	62.36		8.49207e+06		1.21112e+07
38.58	25.14	72.13	62.45				1.27736e+07
39.14	26.89	74.25	50.98				1.19638e+07
39.53	27.05	75.6	56.03				1.11925e+07
	27.17	68.38	59.99				1.23823e+07
	28.73	70.92	56.76				1.23561e+07
							1.16402e+07
							1.16658e+07
							1.13147e+07
							1.17707e+07
							1.26586e+07
							1.19596e+07
