# Supplementary material for: ahctf1 and kras mutations combine to amplify oncogenic stress and restrict liver overgrowth in a zebrafish model of hepatocellular carcinoma
Source: eLife. 2023 Jan 17;12:e73407. doi: 10.7554/eLife.73407 (PMC9897728; doi:10.7554/eLife.73407)
Supplement: Figure 7—source data 1. — Figure 7d: Quantitation of liver volume (µm3) of TO(krasG12V)T/+ zebrafish larvae; impact of ahctf1 mutation and Selinexor treatment individually and in combination. [file elife-73407-fig7-data1.xlsx]

## Sheet: Sheet1
Figure 7b Source Data									Figure 7d Source Data
Liver volume [µm3]									Liver volume [µm3]
ranbp2+/+; ahctf1+/+; 2-CLiP	ranbp2+/-; ahctf1+/+; 2-CLiP	ranbp2+/+; ahctf1+/-; 2-CLiP	ranbp2+/-; ahctf1+/-; 2-CLiP	ranbp2+/+; ahctf1+/+; TO(kras)T/+	ranbp2+/-; ahctf1+/+; TO(kras)T/+	ranbp2+/+; ahctf1+/-; TO(kras)T/+	ranbp2+/-; ahctf1+/-; TO(kras)T/+		ahctf1+/+; 2-CLiP					ahctf1+/+; TO(kras)T/+					ahctf1+/+; TO(kras)T/+
2.4024e+06	1.33243e+06	2.39478e+06	1.88241e+06	7.50773e+06	5.86582e+06	4.62417e+06	847607		DMSO	0.10 µM Selinexor	0.50 µM Selinexor	1.00 µM Selinexor	2.00 µM Selinexor	DMSO	0.10 µM Selinexor	0.50 µM Selinexor	1.00 µM Selinexor	2.00 µM Selinexor	DMSO	0.10 µM Selinexor	0.50 µM Selinexor	1.00 µM Selinexor	2.00 µM Selinexor
2.10514e+06	1.79031e+06	2.20213e+06	2.20291e+06	7.55314e+06	5.95255e+06	4.26737e+06	922282		2.08706e+06	1.5629e+06	1.45107e+06	2.28251e+06	2.21665e+06	7154088	5514267	4400746	4472065	5203452	5195157	2749501	2144602	1454558	823020
2.222e+06	2.27936e+06	2.0414e+06	2.20914e+06	7.67399e+06	6.00808e+06	4.54757e+06	939960		1.61077e+06	2.06045e+06	2.29823e+06	2.13275e+06	1.98974e+06	7335798	5770105	5007590	4883430	5202597	5387886	2897209	2254794	1573908	841223
1.44219e+06	1.91349e+06	1.47317e+06	1.9318e+06	8.08357e+06	6.02771e+06	4.91741e+06	952739		1.9066e+06	1.82628e+06	2.01639e+06	2.40963e+06	2.11731e+06	7379660	5995140	5132415	4511482	5323441	5410709	3055888	2325803	1670508	987996
1.57189e+06	1.68402e+06	1.39921e+06	2.43892e+06	8.30932e+06	6.12517e+06	4.95274e+06	1.05243e+06		2.01296e+06	1.7593e+06	1.9733e+06	1.98394e+06	2.30409e+06	7450843	6071128	5247707	5967131	4375222	5479684	3102109	2374477	1787852	1103156
2.04912e+06	1791949	1.96105e+06	1.79659e+06	6.78897e+06	6.8628e+06	4.98656e+06	1.09234e+06		1.44452e+06	1.51843e+06	2.49111e+06	2.32536e+06	2.28358e+06	7468042	6975477	5253992	4567932	4571780	5616183	3379685	2376031	1797716	1333090
2.32787e+06	1.41472e+06	2.18295e+06	2.09088e+06	6.85649e+06	6.17261e+06	5.08223e+06	1.18048e+06		1.96442e+06	1.82096e+06	2.0812e+06	1.8322e+06	1.73778e+06	7548541	6143581	5377653	5031113	3563024	5618720	3443028	3093350	1811378	1164899
2.16388e+06	1.42598e+06	2.2853e+06	1.82943e+06	6.90794e+06	6.8044e+06	5.12544e+06	1.23748e+06		1.79872e+06	1.90279e+06	2.04897e+06	2.11169e+06	1.97768e+06	7571758	6232220	5433265	4650977	5309847	5701006	3577489	2406168	1854698	1173137
2.01656e+06	1.35742e+06	1.77115e+06	1.63164e+06	6.95301e+06	6.25347e+06	5.16956e+06	1.36388e+06		1.71501e+06	1.41184e+06	2.26544e+06	1.45646e+06	2.37885e+06	7631408	6320994	4870360	5862016	3215418	5730339	3498067	2414854	1894063	1223511
2.24752e+06	1.87547e+06	2.16602e+06	1.96681e+06	7.02889e+06	6.27653e+06	5.17297e+06	1.40393e+06		1.74501e+06	1.66343e+06	2.55611e+06	2.45675e+06	1.55271e+06	7694292	6323852	5473798	4668006	3627024	5817433	3202914	3026007	2302832	1248373
2.2185e+06	2.06414e+06	2.3715e+06	2.35682e+06	7.05057e+06	6.99193e+06	4.22289e+06	1.45747e+06		1.8479e+06	2.12406e+06	1.85736e+06	2.4683e+06	2.20963e+06	7860536	6350881	5533813	4758339	4696320	5916542	3905720	2434283	2627049	1253505
2.17735e+06	2.45645e+06	1.70239e+06	2.32068e+06	7.05349e+06	6.29334e+06	5.28375e+06	1.53206e+06		2.44129e+06	2.19668e+06	2.35226e+06	2.19714e+06	1.65647e+06	7939173	6458243	5616599	4890632	3745632	5953172	3622737	2495712	1929416	1396073
2.26584e+06	1.95471e+06	2.36827e+06	1.58483e+06	7.09984e+06	6.31786e+06	5.28877e+06	1.68271e+06		1.74091e+06	2.47415e+06	1.73673e+06	2.23499e+06	1.72736e+06	8080023	6543528	5716012	5038612	4208162	6048665	3677847	2536963	1933468	1466624
1.87056e+06	1.5711e+06	2.41776e+06	1.71136e+06	7.12934e+06	6.3538e+06	5.29275e+06	1.75521e+06		1.90588e+06	1.74109e+06	2.25081e+06	1.78775e+06	2.53707e+06	8133958	6727226	5857310	5071971	4015357	6098483	3679645	2560835	2662249	1468277
1.77854e+06	1.98255e+06	2.02126e+06	2.25101e+06	7.16514e+06	6.36487e+06	5.31682e+06	1.78359e+06		2.21434e+06	1.70134e+06	1.96396e+06	2224100	2.13525e+06	8263119	6771125	5888583	5162893	3839316	6102470	3713534	2602065	2174885	1069857
2.07974e+06	1.35041e+06	2.01654e+06	2.30016e+06	7.17221e+06	6.40857e+06	5.34926e+06	1.7981e+06		2.08401e+06	2.38024e+06	1.85733e+06	2.12653e+06	2.6494e+06	8344499	6874191	5911581	5438174	4150250	6161403	3743849	2663792	2299802	1536613
1.65039e+06	2.03002e+06	2.16309e+06	1.66813e+06	7.17494e+06	7.12904e+06	5.36001e+06	1.81381e+06		1.95734e+06	2.13543e+06	2.4736e+06	2.35494e+06	1.96569e+06	8512101	6793116	6021419	5498746	4862668	6312775	3840503	2886619	2036713	1839396
2.04454e+06	2.07189e+06	1.2712e+06	1.62483e+06	7.21471e+06	6.43136e+06	5.39156e+06	1.82407e+06		2.02336e+06	1.89422e+06	2.07551e+06	2.31697e+06	2.51924e+06	8525205	5656605	6149732	5510380	4398675	6341034	3883805	2893328	2051452	1564587
2.23919e+06	1.88632e+06	1.72207e+06	2.33635e+06	7.22463e+06	6.44085e+06	4.10874e+06	1.85972e+06		1.80354e+06	1.83653e+06	2.52421e+06	1.65288e+06	1.95785e+06	8649022	7213975	6227867	5567980	3923323	6357397	3903260	2928198	2067752	1605501
1.31909e+06	2.17139e+06	2.09024e+06	2.40574e+06	7.22973e+06	6.45151e+06	5.45836e+06	1.9226e+06		1.69824e+06	2.23018e+06	2.2827e+06	1.60545e+06	1.7373e+06	8846296	7261543	6583430	5574472	5121769	6419737	4050248	3199263	2071998	1645291
1.8296e+06	1.9773e+06	1.84949e+06	1.47245e+06	7.34216e+06	6.60097e+06	5.53716e+06	2.0309e+06		1.83552e+06	1.89474e+06	2.05316e+06	2.34112e+06	2.20879e+06	8970115	7360286	6631380	5586632	3929791	6634009	4170178	3286862	2080256	1649028
1.3752e+06	2.25986e+06	2.19531e+06	1.58009e+06	7.3595e+06	6.6117e+06	5.56399e+06	2.06856e+06		1.84406e+06	2.00233e+06	1.90884e+06	2.55367e+06	2.46801e+06		7442907		5662791	4968286		4228902	3348278	2093638	1728863
2.2089e+06	2.17468e+06	1.52524e+06	1.96024e+06	7.38091e+06	6.61872e+06	5.61615e+06	2.10433e+06		1.85983e+06	1.82079e+06	2.07938e+06	1.88507e+06	2.04495e+06		7713146		4029549	3984056		4348379	3422333	2424638	1733803
1.84655e+06	2.12636e+06	2.20767e+06	1.94274e+06	7.47619e+06	6.71541e+06	4.47276e+06	2.13687e+06		2.49648e+06	1.57842e+06	2.03452e+06	1.76816e+06	1.74279e+06				4317261			4423702	3594636	2518952	1925453
1.32e+06	1.56639e+06	1.61217e+06	2.38342e+06	7.75962e+06	6.7201e+06	4.37747e+06	2.14389e+06		2.30057e+06	2004628	2.23019e+06	1.85506e+06	1.89532e+06								2701503	2591535
1.78616e+06	1.72249e+06	1.40496e+06	1.57442e+06	7.79685e+06	6.72402e+06	5.69571e+06	2.1908e+06		1.63337e+06	2013094	1.81593e+06	1.51563e+06	1.77558e+06								3531140	2752746
1.93091e+06	1.79715e+06	2.31093e+06	1.79193e+06	7.82086e+06	7.0223e+06	5.71806e+06	2.24507e+06		2.25924e+06	1.85694e+06	2.29377e+06	2.14027e+06	1.50122e+06
1.64441e+06	1.51046e+06	1.88847e+06	1.29728e+06	7.96677e+06	7.28809e+06	5.74885e+06	2.24822e+06		1.68647e+06	1.63894e+06	2.30898e+06	1.70858e+06	1.60919e+06
1.8369e+06	2.11552e+06	1.93767e+06	2.10923e+06	8.12607e+06	7.36743e+06	5.85093e+06	2.29735e+06		1.8422e+06	1.74725e+06	2.27493e+06	1.89196e+06	1.88005e+06
1858070	2.34325e+06	1.89405e+06	2.0155e+06	8.26886e+06	7.45416e+06	5.89531e+06	2.36899e+06		2.14741e+06	2.04833e+06	2.50784e+06	2.10299e+06	2.08292e+06
1.48247e+06	2.09983e+06	1.48322e+06	2.50541e+06		7.65607e+06	5.9628e+06	2.39187e+06		2.41985e+06	2.04684e+06	2.20017e+06	1.60034e+06	2.49299e+06
2.29321e+06	1.22718e+06	1.31842e+06	1.95588e+06		7.72935e+06	5.97541e+06	2.40354e+06		2.60691e+06	1.51853e+06	1940647	2.38523e+06	1.57118e+06
1.48298e+06	2.40255e+06	2.25611e+06	1.83877e+06			6.03847e+06	2.50072e+06		2.28748e+06	2.19211e+06	1.67686e+06	1.8291e+06	2.30394e+06
2.33197e+06	1.90892e+06	1.96063e+06	2.06813e+06			6.09276e+06	2.50983e+06		1.99735e+06	2.10904e+06	1.88518e+06	1.89963e+06	2.26306e+06
2.44434e+06	1.78686e+06	2.14483e+06	1.85477e+06			6.16203e+06	2.71549e+06		1.92918e+06	2.20193e+06	1.93738e+06	2.10274e+06	2.04962e+06
2.27322e+06	1.72825e+06	1.8513e+06	1.57707e+06			6.22611e+06	1.85893e+06		2.06219e+06	2.15427e+06	1.91418e+06	1.41137e+06	2.05384e+06
2.07353e+06	2.20588e+06	2.49111e+06	2.46302e+06				1.58387e+06		1.94115e+06	2.01574e+06	2.63417e+06	1.7557e+06	2.28869e+06
2.14587e+06	1.93838e+06	1.74846e+06	1.40621e+06						2.16386e+06	2.09025e+06	1.58055e+06	1.85144e+06	1.90218e+06
1.76147e+06	1.67526e+06	1.67153e+06	1.34368e+06						2.19875e+06	2.54098e+06	1.86832e+06	1.94101e+06	2.06702e+06
1.90466e+06	1.46625e+06	2.00458e+06	1.83518e+06						1.98134e+06	2.20031e+06	1.94992e+06	1.97831e+06	2.29729e+06
2.1259e+06	1.73455e+06								2123347	1.74612e+06	1.87732e+06	1.72671e+06	1.91082e+06
2.41812e+06	1.93894e+06												2.23672e+06
1.86213e+06	2.28729e+06												1.66976e+06
	2.34369e+06												1.75549e+06
