# Supplementary material for: ahctf1 and kras mutations combine to amplify oncogenic stress and restrict liver overgrowth in a zebrafish model of hepatocellular carcinoma
Source: eLife. 2023 Jan 17;12:e73407. doi: 10.7554/eLife.73407 (PMC9897728; doi:10.7554/eLife.73407)
Supplement: Figure 8—source data 1. [file elife-73407-fig8-data1.xlsx]

## Sheet: Sheet1
Figure 8a Source Data
STUDY_ID	SAMPLE_ID	mRNA expression (RNAseq V2 RSEM) z-score relative to diploid samples in the LIHC dataset (TCGA)
		AHCTF1	NUP37	NUP43	NUP85	NUP98	NUP107	NUP133	NUP160	SEC13	SEH1L
lihc_tcga_pan_can_atlas_2018	TCGA-2V-A95S-01	0.3507	0.51	-0.1965	0.8236	-0.98	0.6093	-0.2023	-0.9133	-0.4024	1.4841
lihc_tcga_pan_can_atlas_2018	TCGA-2Y-A9GS-01	0.423	0.9853	1.5145	1.5159	0.824	1.1894	1.4878	0.2993	0.6999	0.5389
lihc_tcga_pan_can_atlas_2018	TCGA-2Y-A9GT-01	-0.5906	-0.8747	-0.0467	-0.1735	-0.657	-0.8995	-0.848	-0.3854	0.1417	-1.9493
lihc_tcga_pan_can_atlas_2018	TCGA-2Y-A9GU-01	4.3549	-0.5634	-0.5447	-0.8967	0.1257	-0.3911	1.6322	-0.4488	-0.7635	-1.0789
lihc_tcga_pan_can_atlas_2018	TCGA-2Y-A9GV-01	-0.112	-0.7937	0.3891	-0.1896	-0.4	-0.2401	-0.2554	-0.2285	-0.2402	-0.7247
lihc_tcga_pan_can_atlas_2018	TCGA-2Y-A9GW-01	1.4611	-0.5379	-0.2519	-0.8016	-0.3798	-0.0961	1.445	-0.8331	-0.7422	0.0602
lihc_tcga_pan_can_atlas_2018	TCGA-2Y-A9GX-01	1.4144	-1.0729	0.9796	-0.3967	1.1084	-0.3955	1.5091	0.3819	-1.0402	0.5318
lihc_tcga_pan_can_atlas_2018	TCGA-2Y-A9GY-01	-0.4522	1.5257	2.1462	5.2671	0.1164	1.1172	1.0099	1.0341	0.9681	0.7317
lihc_tcga_pan_can_atlas_2018	TCGA-2Y-A9GZ-01	1.8772	-0.7463	-1.1825	5.0965	0.9979	-0.6618	1.4943	1.3641	-0.8481	-0.9107
lihc_tcga_pan_can_atlas_2018	TCGA-2Y-A9H0-01	1.6761	2.3785	-0.7444	2.1798	0.0101	3.3907	1.2351	0.3322	1.3985	-0.2482
lihc_tcga_pan_can_atlas_2018	TCGA-2Y-A9H1-01	-1.2817	-0.4359	0.3531	1.4871	-1.9892	-1.6724	-0.157	-1.5939	0.9365	-0.7241
lihc_tcga_pan_can_atlas_2018	TCGA-2Y-A9H2-01	0.9121	0.3718	0.1234	1.6265	-0.0933	0.739	2.075	0.4407	-2.0562	0.2676
lihc_tcga_pan_can_atlas_2018	TCGA-2Y-A9H3-01	-0.935	0.5611	-0.366	1.0396	-1.6017	-1.1509	1.0933	-1.3157	-0.4097	-2.0584
lihc_tcga_pan_can_atlas_2018	TCGA-2Y-A9H4-01	-0.625	0.2672	-0.3982	0.739	0.9597	-0.0486	-0.4071	0.0758	0.224	1.9113
lihc_tcga_pan_can_atlas_2018	TCGA-2Y-A9H5-01	0.9707	-0.5111	-1.0169	-0.5541	0.2711	-0.2153	3.2337	0.4108	-1.473	0.1898
lihc_tcga_pan_can_atlas_2018	TCGA-2Y-A9H6-01	1.5356	-0.4229	-0.1346	0.0983	-1.2358	-0.2896	1.3328	-0.8947	0.2227	-0.5086
lihc_tcga_pan_can_atlas_2018	TCGA-2Y-A9H7-01	1.6217	0.6169	-1.2116	0.4231	-0.3804	-0.6046	4.3541	0.455	-0.3854	3.7105
lihc_tcga_pan_can_atlas_2018	TCGA-2Y-A9H8-01	2.4183	0.7339	-0.544	0.903	-0.8198	0.2043	0.8542	1.0754	0.9438	-1.137
lihc_tcga_pan_can_atlas_2018	TCGA-2Y-A9H9-01	0.4165	-1.0229	-1.0177	1.6191	0.1194	1.9492	-0.0124	-0.5324	-0.0391	-0.9382
lihc_tcga_pan_can_atlas_2018	TCGA-2Y-A9HA-01	1.2232	0.5854	-0.015	-0.008	0.2783	0.9619	-1.6596	0.533	-0.6973	0.7831
lihc_tcga_pan_can_atlas_2018	TCGA-2Y-A9HB-01	2.4614	-0.3827	0.1218	0.4352	0.0359	-0.7712	2.7229	-0.2672	-1.3432	-0.4631
lihc_tcga_pan_can_atlas_2018	TCGA-3K-AAZ8-01	-0.4596	-0.6231	-1.0673	0.1743	-0.8052	-0.8111	-0.1558	-0.6576	-0.3262	1.2161
lihc_tcga_pan_can_atlas_2018	TCGA-4R-AA8I-01	0.7172	0.3505	-1.3489	-0.0285	0.0413	0.7654	1.2949	0.4654	0.652	-0.6834
lihc_tcga_pan_can_atlas_2018	TCGA-5C-A9VG-01	7.2689	3.6161	1.5301	3.0583	2.6152	1.4329	10.3229	1.2597	-0.1368	-0.4831
lihc_tcga_pan_can_atlas_2018	TCGA-5C-A9VH-01	3.434	-0.3853	0.5393	-0.79	0.4012	-0.0173	2.3872	0.2651	-0.6518	0.362
lihc_tcga_pan_can_atlas_2018	TCGA-5C-AAPD-01	0.7603	0.7044	0.4018	3.1208	-1.3949	0.3791	2.9745	-1.3655	0.7896	-1.6359
lihc_tcga_pan_can_atlas_2018	TCGA-5R-AA1C-01	5.9999	1.8306	-1.0207	-0.5973	-0.7336	-0.3122	5.0829	1.4329	2.6787	-0.7394
lihc_tcga_pan_can_atlas_2018	TCGA-5R-AA1D-01	0.9124	-0.1436	0.0369	-0.9676	-0.6696	-0.2674	1.1716	0.6118	-0.765	-0.8187
lihc_tcga_pan_can_atlas_2018	TCGA-5R-AAAM-01	-0.0324	-0.7132	-1.4459	-0.5222	-0.2596	-0.6391	-0.876	-0.5366	-0.3996	-0.3248
lihc_tcga_pan_can_atlas_2018	TCGA-BC-4072-01	-0.7548	0.1735	-0.047	1.7705	0.8118	0.0065	0.7963	1.3515	-0.7732	-1.0505
lihc_tcga_pan_can_atlas_2018	TCGA-BC-4073-01	1.0265	-0.3376	0.4615	-0.3625	-0.0902	0.8317	0.7148	1.4572	0.1885	0.9908
lihc_tcga_pan_can_atlas_2018	TCGA-BC-A10Q-01	-0.1844	-0.4726	-1.1719	1.1152	-1.0924	-0.8618	-0.0022	-0.6192	-1.1196	-2.1142
lihc_tcga_pan_can_atlas_2018	TCGA-BC-A10R-01	3.279	-0.6551	-0.9113	-1.391	-0.817	-0.9828	3.3119	-0.6931	-1.1435	0.0005
lihc_tcga_pan_can_atlas_2018	TCGA-BC-A10S-01	-0.9362	-0.9712	-0.4409	-0.37	-1.4204	-0.9795	-0.6491	-1.2511	-0.248	0.2951
lihc_tcga_pan_can_atlas_2018	TCGA-BC-A10T-01	2.6125	0.2949	0.4468	1.5807	1.0508	0.8518	0.5055	0.1575	-0.7019	1.6776
lihc_tcga_pan_can_atlas_2018	TCGA-BC-A10U-01	4.0021	-0.5332	0.423	-0.0329	0.7576	0.0381	1.4428	-0.577	0.6838	1.2422
lihc_tcga_pan_can_atlas_2018	TCGA-BC-A10W-01	-0.2218	1.3391	0.0698	1.9428	0.9829	2.4048	-1.2438	2.8749	-1.1606	1.0524
lihc_tcga_pan_can_atlas_2018	TCGA-BC-A10X-01	1.3549	-1.0947	-1.1269	-0.501	1.9563	-0.4629	0.5315	0.147	-0.9698	0.4691
lihc_tcga_pan_can_atlas_2018	TCGA-BC-A10Y-01	0.36	0.6327	1.5965	3.804	0.8544	1.4602	1.0498	0.3399	1.0766	-0.9486
lihc_tcga_pan_can_atlas_2018	TCGA-BC-A10Z-01	1.4587	-0.9848	0.5137	0.4706	1.2405	0.1549	0.4364	0.501	0.58	0.3806
lihc_tcga_pan_can_atlas_2018	TCGA-BC-A110-01	-0.3624	-1.0366	-0.8838	-0.5209	2.2274	-0.6885	-0.8608	-1.0508	-0.2323	2.7351
lihc_tcga_pan_can_atlas_2018	TCGA-BC-A112-01	2.7221	-0.5671	4.7589	1.7815	0.3016	1.5402	2.7345	0.9534	-1.1049	-1.4387
lihc_tcga_pan_can_atlas_2018	TCGA-BC-A216-01	4.0614	-0.0354	1.5966	-0.4405	0.6914	1.1329	2.0102	0.7129	-1.3953	0.8542
lihc_tcga_pan_can_atlas_2018	TCGA-BC-A217-01	0.441	-0.0285	0.5794	7.5718	0.68	0.4276	0.6203	-0.0086	2.1906	-1.0902
lihc_tcga_pan_can_atlas_2018	TCGA-BC-A3KF-01	0.6343	-0.1841	-1.1361	-0.438	1.1673	0.3278	-0.8772	-0.6601	0.3934	-1.1088
lihc_tcga_pan_can_atlas_2018	TCGA-BC-A3KG-01	12.32	1.2421	3.2611	2.0655	2.9217	3.8559	11.9919	1.6063	0.1799	-0.1589
lihc_tcga_pan_can_atlas_2018	TCGA-BC-A5W4-01	3.1161	0.032	-1.431	-0.4982	-0.6121	-0.1762	1.6662	-0.8445	1.7109	-0.1538
lihc_tcga_pan_can_atlas_2018	TCGA-BC-A69H-01	-1.3414	3.0195	-0.2611	5.0786	-0.3346	0.2572	0.0383	-0.1689	3.7048	0.4323
lihc_tcga_pan_can_atlas_2018	TCGA-BC-A69I-01	1.7064	-0.6603	-1.7942	-0.5945	-0.5197	-0.8897	0.2108	-0.8031	-0.0526	0.032
lihc_tcga_pan_can_atlas_2018	TCGA-BC-A8YO-01	1.1643	1.4881	2.2393	1.1577	1.545	2.7693	1.9369	4.5348	-0.6067	2.0713
lihc_tcga_pan_can_atlas_2018	TCGA-BD-A2L6-01	-0.6841	0.2582	1.8912	0.4248	-0.1614	-0.0127	-0.8545	-0.7651	-0.0375	-1.0578
lihc_tcga_pan_can_atlas_2018	TCGA-BD-A3EP-01	-0.122	-0.663	0.6295	0.5147	0.923	-0.1003	0.2476	0.0776	-0.1466	0.6398
lihc_tcga_pan_can_atlas_2018	TCGA-BW-A5NO-01	-0.3828	1.4469	-0.5939	1.6132	-1.0163	2.1644	0.5992	-0.6036	1.6869	0.516
lihc_tcga_pan_can_atlas_2018	TCGA-BW-A5NP-01	4.6945	0.17	-1.0398	-0.2153	-0.7918	0.4035	8.1466	1.1046	0.2026	-0.5954
lihc_tcga_pan_can_atlas_2018	TCGA-BW-A5NQ-01	1.4502	4.4497	4.6101	2.6154	3.1479	3.8551	3.7578	3.2434	0.3617	2.8381
lihc_tcga_pan_can_atlas_2018	TCGA-CC-5258-01	2.0128	1.7323	2.0482	0.7752	1.7477	1.9069	1.6815	4.158	0.1226	2.856
lihc_tcga_pan_can_atlas_2018	TCGA-CC-5259-01	-0.532	-0.1253	0.0327	-1.5294	-0.6445	-0.2592	1.1271	-1.0498	-0.256	3.4916
lihc_tcga_pan_can_atlas_2018	TCGA-CC-5260-01	0.2003	-0.6108	0.0666	1.1312	1.1375	0.7321	1.5808	0.7774	-1.458	-0.1957
lihc_tcga_pan_can_atlas_2018	TCGA-CC-5261-01	4.3147	-0.2396	0.7809	0.6377	0.5204	0.1294	7.6969	1.3112	-1.8	-0.2796
lihc_tcga_pan_can_atlas_2018	TCGA-CC-5262-01	-0.2367	0.4152	-1.5157	-0.0331	-0.4397	-0.3538	0.8942	-0.8988	-0.4934	0.5383
lihc_tcga_pan_can_atlas_2018	TCGA-CC-5263-01	1.6185	-0.9096	4.0565	2.7035	2.4417	2.1584	1.943	1.9496	-1.7581	2.4309
lihc_tcga_pan_can_atlas_2018	TCGA-CC-5264-01	3.9142	1.9889	2.3711	1.9093	3.4754	3.3256	6.9695	2.4624	0.1264	0.7786
lihc_tcga_pan_can_atlas_2018	TCGA-CC-A123-01	-1.9206	-0.3671	0.8969	4.1492	-2.1063	-1.7049	1.4901	-1.0368	2.4672	-0.1362
lihc_tcga_pan_can_atlas_2018	TCGA-CC-A1HT-01	1.2382	1.7802	0.4709	1.8591	1.9744	2.4677	2.6708	1.101	-0.0454	4.3007
lihc_tcga_pan_can_atlas_2018	TCGA-CC-A3M9-01	1.386	1.6128	0.2385	3.2523	0.9086	3.8004	1.3694	1.442	5.4154	1.2619
lihc_tcga_pan_can_atlas_2018	TCGA-CC-A3MA-01	-1.1031	-0.3646	0.5012	1.5136	-1.2842	1.5375	4.3516	2.2717	-1.9195	0.6083
lihc_tcga_pan_can_atlas_2018	TCGA-CC-A3MB-01	0.8391	0.4528	-0.0241	2.1814	0.735	1.0269	0.0546	0.1366	-1.1566	-0.9784
lihc_tcga_pan_can_atlas_2018	TCGA-CC-A3MC-01	2.8738	-0.9169	1.0341	0.2262	-0.8257	-0.3925	0.2825	-0.4183	-0.9276	0.7294
lihc_tcga_pan_can_atlas_2018	TCGA-CC-A5UC-01	4.2546	2.9247	0.2916	2.3556	-0.2164	2.7683	4.3775	0.2764	0.7765	1.8503
lihc_tcga_pan_can_atlas_2018	TCGA-CC-A5UD-01	0.2632	3.6598	0.7968	2.0945	1.2807	2.0017	0.0633	-0.0219	1.2647	-0.7081
lihc_tcga_pan_can_atlas_2018	TCGA-CC-A5UE-01	0.607	1.641	-0.2085	6.3136	0.1056	0.7197	2.2162	1.5249	-0.3421	1.4487
lihc_tcga_pan_can_atlas_2018	TCGA-CC-A7IE-01	4.336	1.2466	2.6169	1.314	1.9867	2.7756	1.3724	1.2673	3.3207	1.507
lihc_tcga_pan_can_atlas_2018	TCGA-CC-A7IF-01	1.1377	-0.2671	-0.9287	2.0226	-2.1451	-0.4087	-1.4992	-0.0722	-0.4517	-0.5472
lihc_tcga_pan_can_atlas_2018	TCGA-CC-A7IG-01	-0.3813	0.1139	0.5941	4.5873	-1.4583	-0.1653	-0.5769	-0.9507	1.9073	1.4394
lihc_tcga_pan_can_atlas_2018	TCGA-CC-A7IH-01	5.5333	-0.1431	-0.3169	-1.5276	-0.3831	-0.2357	3.4779	0.4615	0.1272	-0.5032
lihc_tcga_pan_can_atlas_2018	TCGA-CC-A7II-01	0.6878	4.8661	4.829	3.9407	3.3878	4.9255	1.8415	1.937	1.0075	4.3085
lihc_tcga_pan_can_atlas_2018	TCGA-CC-A7IJ-01	-0.2911	1.4344	1.9886	3.8825	-0.3222	3.3813	-0.5952	2.3646	5.9867	1.2475
lihc_tcga_pan_can_atlas_2018	TCGA-CC-A7IK-01	5.6677	1.6007	2.2721	1.204	0.1025	1.4454	7.7481	0.5756	0.6066	-0.308
lihc_tcga_pan_can_atlas_2018	TCGA-CC-A7IL-01	1.162	-0.9351	-0.4486	2.3426	-0.3407	-1.0055	1.0735	-1.0474	0.426	-0.4101
lihc_tcga_pan_can_atlas_2018	TCGA-CC-A8HT-01	2.4492	0.8777	3.4076	0.9863	1.3146	1.7564	1.1039	0.008	0.9311	1.7475
lihc_tcga_pan_can_atlas_2018	TCGA-CC-A8HU-01	1.3283	0.7401	1.1008	5.2018	-0.7352	1.3572	2.6275	0.2113	-0.5759	-0.1949
lihc_tcga_pan_can_atlas_2018	TCGA-CC-A8HV-01	3.8343	-0.4531	2.4993	2.3559	0.9368	2.5912	0.4979	1.2994	1.0316	-0.1565
lihc_tcga_pan_can_atlas_2018	TCGA-CC-A9FS-01	2.6998	-0.4088	-0.7926	-0.4729	0.703	-0.0885	0.3952	0.043	-0.4966	6.9238
lihc_tcga_pan_can_atlas_2018	TCGA-CC-A9FU-01	3.2861	0.6449	3.5253	2.4688	-0.0025	1.5813	5.6926	1.4673	0.128	1.114
lihc_tcga_pan_can_atlas_2018	TCGA-CC-A9FV-01	-1.0111	-1.05	-0.4071	-0.7452	-0.7155	-0.8619	-0.6021	-0.8225	-1.1691	-1.6191
lihc_tcga_pan_can_atlas_2018	TCGA-CC-A9FW-01	1.2444	1.3598	-1.9364	2.2191	-2.2968	1.3067	1.7344	0.3326	1.8046	1.3218
lihc_tcga_pan_can_atlas_2018	TCGA-DD-A113-01	2.4096	-0.349	-0.0522	-0.3215	-0.1593	-0.5791	2.283	0.6141	-1.4581	1.178
lihc_tcga_pan_can_atlas_2018	TCGA-DD-A114-01	1.5095	0.154	0.587	2.7109	1.783	0.5175	3.6896	0.7794	0.6084	0.339
lihc_tcga_pan_can_atlas_2018	TCGA-DD-A115-01	-0.7055	-0.5723	-1.1841	0.8168	-0.9809	-0.1105	-0.1399	-0.2118	0.6768	-0.2121
lihc_tcga_pan_can_atlas_2018	TCGA-DD-A116-01	-1.0038	0.8872	-1.0411	1.5449	-1.3479	-0.4818	-0.8209	1.1622	5.7977	-0.0958
lihc_tcga_pan_can_atlas_2018	TCGA-DD-A118-01	2.2855	-0.5528	-0.8708	-1.0467	0.6634	-0.6301	1.4354	0.8409	0.431	-1.2535
lihc_tcga_pan_can_atlas_2018	TCGA-DD-A119-01	0.3565	0.957	-0.9835	-0.6613	-0.7106	-1.1675	2.8936	-0.8899	-0.7083	3.4925
lihc_tcga_pan_can_atlas_2018	TCGA-DD-A11A-01	2.4569	-0.3185	-0.2853	0.4192	4.1418	0.2278	1.536	1.5508	-0.6695	0.5888
lihc_tcga_pan_can_atlas_2018	TCGA-DD-A11B-01	4.9211	-0.4363	0.9381	-0.6182	0.7941	0.0365	4.5221	0.5441	-1.1296	-0.6401
lihc_tcga_pan_can_atlas_2018	TCGA-DD-A11C-01	0.6864	-0.3448	-0.3409	1.5029	1.4806	0.6813	1.3428	0.9339	-0.6783	-0.5567
lihc_tcga_pan_can_atlas_2018	TCGA-DD-A11D-01	0.5525	-1.0144	-0.9971	-0.4015	-0.0052	-0.6533	1.0686	-0.6266	-0.6007	-0.592
lihc_tcga_pan_can_atlas_2018	TCGA-DD-A1EA-01	5.6397	-0.1803	-1.2574	0.0998	0.9886	-0.0683	6.3536	0.4852	-1.1204	0.0662
lihc_tcga_pan_can_atlas_2018	TCGA-DD-A1EB-01	0.4939	-1.1997	-0.3851	3.3427	1.4925	-0.7196	-0.1091	0.0466	-0.1035	-1.3478
lihc_tcga_pan_can_atlas_2018	TCGA-DD-A1EC-01	-0.6102	-0.4426	-0.4842	-1.5155	0.6425	-0.6593	-0.0408	0.6676	-0.104	0.0828
lihc_tcga_pan_can_atlas_2018	TCGA-DD-A1ED-01	-0.2471	-0.7004	-1.285	-0.8122	-0.1864	-0.4451	-0.011	-0.2864	-0.3859	-0.7025
lihc_tcga_pan_can_atlas_2018	TCGA-DD-A1EE-01	6.3675	-0.305	-1.5928	-1.0753	0.9761	0.0519	6.0491	0.0533	-1.1777	1.6544
lihc_tcga_pan_can_atlas_2018	TCGA-DD-A1EF-01	2.3136	0.1486	2.6731	-0.2531	0.0863	0.4884	3.0264	2.2442	1.3247	-0.9109
lihc_tcga_pan_can_atlas_2018	TCGA-DD-A1EG-01	0.6773	-0.4422	-1.039	-0.7046	-0.0093	-0.4929	1.6109	-0.6675	0.3951	1.4367
lihc_tcga_pan_can_atlas_2018	TCGA-DD-A1EH-01	7.1728	-0.186	-1.0477	-0.5896	1.8819	0.0171	8.9929	2.1432	-1.546	2.0296
lihc_tcga_pan_can_atlas_2018	TCGA-DD-A1EI-01	0.8954	1.0152	-0.8776	-0.0002	0.6029	0.883	0.117	0.566	-0.2692	0.1605
lihc_tcga_pan_can_atlas_2018	TCGA-DD-A1EJ-01	1.3182	1.2455	0.662	0.9615	0.0657	1.3352	2.2948	0.6927	1.5654	-0.3651
lihc_tcga_pan_can_atlas_2018	TCGA-DD-A1EK-01	1.7918	-0.8413	-1.9865	-0.3749	0.0734	-1.0017	-0.1376	-0.3144	-0.2834	0.1067
lihc_tcga_pan_can_atlas_2018	TCGA-DD-A1EL-01	2.7517	2.0772	1.7214	2.1494	0.6958	2.0482	3.7724	0.7572	0.8032	0.9149
lihc_tcga_pan_can_atlas_2018	TCGA-DD-A39V-01	0.4878	1.9802	-0.1979	0.7974	-1.9159	-0.7603	3.1194	-1.171	1.4573	-0.0379
lihc_tcga_pan_can_atlas_2018	TCGA-DD-A39W-01	1.2464	2.082	-0.6419	-0.9034	0.4723	-0.1725	2.6004	1.3091	0.0581	0.1273
lihc_tcga_pan_can_atlas_2018	TCGA-DD-A39X-01	-1.7229	-0.7214	-1.5864	-0.2966	-2.0827	-1.3446	-0.941	-1.1951	0.8825	-0.9048
lihc_tcga_pan_can_atlas_2018	TCGA-DD-A39Y-01	0.1744	2.6519	1.7433	2.814	0.0281	-0.4066	-0.0898	-0.4875	2.324	1.7572
lihc_tcga_pan_can_atlas_2018	TCGA-DD-A39Z-01	-0.3544	-1.2194	-1.6618	0.008	-1.6177	-0.6227	-0.1726	-1.0954	-0.0945	0.4846
lihc_tcga_pan_can_atlas_2018	TCGA-DD-A3A1-01	-0.3872	1.6081	-1.3809	3.0908	-1.2664	-1.0171	0.4108	-1.3729	0.4657	1.476
lihc_tcga_pan_can_atlas_2018	TCGA-DD-A3A2-01	-0.2451	-0.8331	-1.1699	-0.2172	-0.3756	-0.6112	-0.4399	-0.5176	-0.6789	-0.7119
lihc_tcga_pan_can_atlas_2018	TCGA-DD-A3A3-01	0.1402	-0.4291	-1.116	1.0488	-1.5952	-1.0121	0.293	-1.5038	0.445	-0.7025
lihc_tcga_pan_can_atlas_2018	TCGA-DD-A3A4-01	-0.4417	0.3117	-0.6406	0.0644	0.9047	-0.5354	0.4185	0.0503	-0.4085	-2.3166
lihc_tcga_pan_can_atlas_2018	TCGA-DD-A3A5-01	-1.2356	-0.1514	-1.0779	0.6203	-0.6838	-0.0633	-0.5527	0.5336	2.321	-2.0393
lihc_tcga_pan_can_atlas_2018	TCGA-DD-A3A6-01	-1.2647	-1.3525	0.0394	-1.7824	-0.8969	-1.1996	-2.2524	-1.5121	-0.3947	-1.1774
lihc_tcga_pan_can_atlas_2018	TCGA-DD-A3A7-01	0.4614	-0.2602	1.323	-0.1639	-1.8219	-1.0726	0.4952	-1.4532	0.2671	-1.0675
lihc_tcga_pan_can_atlas_2018	TCGA-DD-A3A8-01	5.6489	-0.5016	-1.48	-0.7653	-1.0047	-0.5951	1.8853	1.1044	0.466	-1.0227
lihc_tcga_pan_can_atlas_2018	TCGA-DD-A3A9-01	0.9728	-0.7977	0.9338	1.0765	-1.7853	-0.6781	3.4157	-1.0961	-0.6538	-1.1062
lihc_tcga_pan_can_atlas_2018	TCGA-DD-A4NA-01	3.3647	-0.4337	1.0621	-0.3584	0.3004	1.1167	3.9749	0.2899	-2.1315	-0.8401
lihc_tcga_pan_can_atlas_2018	TCGA-DD-A4NB-01	0.99	-0.5054	0.1409	-1.2369	-0.2451	-0.4993	1.2202	0.1042	-0.8655	-1.7785
lihc_tcga_pan_can_atlas_2018	TCGA-DD-A4ND-01	0.8896	-0.2772	0.8486	-0.1745	1.5687	1.2748	0.2496	2.2383	-0.4714	-0.826
lihc_tcga_pan_can_atlas_2018	TCGA-DD-A4NE-01	5.5515	-0.3255	0.4154	0.0788	1.4219	0.3239	-0.3343	3.018	0.1502	-0.8117
lihc_tcga_pan_can_atlas_2018	TCGA-DD-A4NF-01	6.4897	0.0216	-0.856	-1.1781	-0.6037	-0.1455	5.9343	0.9172	0.5937	-0.4186
lihc_tcga_pan_can_atlas_2018	TCGA-DD-A4NG-01	4.0653	-0.2732	-1.6504	-1.2782	-0.1945	-0.106	2.1615	0.1589	-1.2146	0.8473
lihc_tcga_pan_can_atlas_2018	TCGA-DD-A4NH-01	4.4484	0.6443	-0.3835	2.1368	0.1628	2.1313	3.194	-0.2121	-0.3315	0.0215
lihc_tcga_pan_can_atlas_2018	TCGA-DD-A4NI-01	1.129	-1.2534	-0.3297	0.3341	-0.3927	-0.5903	-0.1338	-0.298	-0.9868	-0.7975
lihc_tcga_pan_can_atlas_2018	TCGA-DD-A4NJ-01	2.0335	0.2408	-0.7892	1.8761	-0.3994	0.707	1.4202	1.163	-0.36	-0.2519
lihc_tcga_pan_can_atlas_2018	TCGA-DD-A4NK-01	2.219	-0.5857	-1.0936	-0.0099	0.3396	-0.6141	1.4791	-0.0839	-0.5426	-0.7413
lihc_tcga_pan_can_atlas_2018	TCGA-DD-A4NL-01	0.1644	-0.9029	-0.2779	-0.8636	-0.1561	-0.506	-0.9827	-0.7237	-0.6486	-0.603
lihc_tcga_pan_can_atlas_2018	TCGA-DD-A4NN-01	5.5225	1.7632	-0.7657	1.45	2.5932	1.0128	10.4931	0.3252	-0.0849	1.1358
lihc_tcga_pan_can_atlas_2018	TCGA-DD-A4NO-01	4.6493	-1.3354	1.0155	-0.2381	0.8623	-0.969	2.655	-0.1608	-1.6142	-0.3489
lihc_tcga_pan_can_atlas_2018	TCGA-DD-A4NP-01	-0.0393	-0.5954	-1.2062	0.0943	-1.0848	-1.0693	-1.2205	0.0696	0.1011	-1.3261
lihc_tcga_pan_can_atlas_2018	TCGA-DD-A4NQ-01	2.6859	0.4161	0.3047	0.0069	1.2705	1.26	2.6244	0.2102	0.1421	1.7578
lihc_tcga_pan_can_atlas_2018	TCGA-DD-A4NR-01	0.2844	0.9001	1.3909	0.9072	-0.3907	1.081	0.2265	-0.2568	-0.2482	-0.0913
lihc_tcga_pan_can_atlas_2018	TCGA-DD-A4NS-01	0.8082	-0.9351	-0.7673	0.1383	0.7293	-0.282	1.3081	0.6995	-1.4251	0.0679
lihc_tcga_pan_can_atlas_2018	TCGA-DD-A4NV-01	-0.4613	-0.9381	-0.5959	-1.2448	0.7666	-0.8754	1.6533	-0.3944	-0.5552	-0.6902
lihc_tcga_pan_can_atlas_2018	TCGA-DD-A73A-01	-0.1367	-1.1226	0.1316	-0.6324	-0.5946	-0.5368	-1.256	-0.0911	-0.5106	0.8999
lihc_tcga_pan_can_atlas_2018	TCGA-DD-A73B-01	2.1758	0.5685	4.2223	1.0278	1.2045	0.5241	0.4933	-0.0568	0.3855	0.0429
lihc_tcga_pan_can_atlas_2018	TCGA-DD-A73C-01	0.7781	-0.8107	-0.7136	-0.5157	1.9346	-1.1538	0.8899	-0.0293	-0.6779	-0.7019
lihc_tcga_pan_can_atlas_2018	TCGA-DD-A73D-01	3.4129	-0.5455	-0.643	2.6841	0.2884	-0.3046	1.8145	0.1915	-0.4924	0.5329
lihc_tcga_pan_can_atlas_2018	TCGA-DD-A73E-01	1.5108	0.5446	-1.2502	-0.6983	-0.3935	0.1556	2.5382	3.1672	0.9569	-1.4593
lihc_tcga_pan_can_atlas_2018	TCGA-DD-A73F-01	0.0963	-0.0755	-1.5279	0.0336	0.8473	-0.0223	0.2777	0.3975	1.1177	-0.9096
lihc_tcga_pan_can_atlas_2018	TCGA-DD-A73G-01	-1.4247	-0.2991	-0.2043	2.6567	-1.5022	-1.3784	2.6031	-1.9379	5.7098	-3.1485
lihc_tcga_pan_can_atlas_2018	TCGA-DD-AA3A-01	4.1814	0.7964	-0.1258	1.2519	0.0755	1.4626	3.1178	-0.2977	0.0504	0.7522
lihc_tcga_pan_can_atlas_2018	TCGA-DD-AAC8-01	5.6909	0.6659	-1.1463	-0.3205	0.0247	0.7524	7.5895	0.2858	1.0002	-0.1309
lihc_tcga_pan_can_atlas_2018	TCGA-DD-AAC9-01	0.2965	-0.2216	-0.8957	-0.1131	-1.0189	-1.0376	2.0312	-1.407	0.6092	-0.8231
lihc_tcga_pan_can_atlas_2018	TCGA-DD-AACA-01	0.6258	0.3467	-0.6901	1.1746	0.5384	0.1604	1.2533	2.2061	0.1362	0.8151
lihc_tcga_pan_can_atlas_2018	TCGA-DD-AACB-01	-0.3032	1.8101	-0.4941	1.0985	-1.3281	-0.0654	0.6606	-0.7048	1.5914	-0.7204
lihc_tcga_pan_can_atlas_2018	TCGA-DD-AACC-01	0.3454	0.3217	0.1236	0.572	0.787	0.0118	1.4467	-0.7036	0.035	-1.8366
lihc_tcga_pan_can_atlas_2018	TCGA-DD-AACD-01	0.3765	-0.3316	-1.1475	-0.6819	-1.425	-1.1147	-0.5772	-1.0937	1.8116	-1.8413
lihc_tcga_pan_can_atlas_2018	TCGA-DD-AACE-01	4.2076	-0.8955	-0.5023	-0.3909	0.6505	-0.9716	4.8414	-0.6679	-0.8741	-1.4103
lihc_tcga_pan_can_atlas_2018	TCGA-DD-AACF-01	0.9455	-0.4626	-1.1026	2.4564	-0.1695	0.4185	3.6252	-0.6531	-0.3735	1.1492
lihc_tcga_pan_can_atlas_2018	TCGA-DD-AACG-01	-0.991	1.0577	0.8068	1.6022	-1.2482	-0.5097	1.938	-0.5451	2.4993	2.7861
lihc_tcga_pan_can_atlas_2018	TCGA-DD-AACH-01	6.1894	0.5845	-0.7163	2.2167	4.4212	0.8922	-2.013	3.0035	-0.699	-0.0849
lihc_tcga_pan_can_atlas_2018	TCGA-DD-AACI-01	0.194	-0.2703	-1.5278	-0.4754	-1.9635	-1.2857	3.3999	-1.3799	-0.0891	-1.8965
lihc_tcga_pan_can_atlas_2018	TCGA-DD-AACJ-01	0.7168	0.1735	-0.7985	4.7245	-1.2147	-1.1739	0.9098	-1.2195	-0.3661	-0.7428
lihc_tcga_pan_can_atlas_2018	TCGA-DD-AACK-01	0.4871	1.2361	-0.2964	-0.0062	0.6471	2.574	0.7477	0.1187	0.6208	1.2933
lihc_tcga_pan_can_atlas_2018	TCGA-DD-AACL-01	1.339	1.8981	1.2238	1.4597	0.0304	1.7994	1.3052	-0.1744	2.0002	1.218
lihc_tcga_pan_can_atlas_2018	TCGA-DD-AACN-01	4.7617	-1.0417	1.3227	-0.2103	2.1982	-0.1522	2.9687	0.9664	-0.7392	-0.8858
lihc_tcga_pan_can_atlas_2018	TCGA-DD-AACO-01	-1.9107	-0.6458	0.1762	0.6232	-1.443	-1.8744	1.7883	-0.8188	-0.9285	-0.3183
lihc_tcga_pan_can_atlas_2018	TCGA-DD-AACP-01	2.1551	4.0647	0.5176	1.8128	-0.2151	1.4353	3.5621	0.086	1.1936	0.0443
lihc_tcga_pan_can_atlas_2018	TCGA-DD-AACQ-01	-0.4617	-0.6491	-0.1618	-0.4896	0.8183	-0.8991	-0.0557	-0.5427	-1.3691	-0.4248
lihc_tcga_pan_can_atlas_2018	TCGA-DD-AACS-01	4.2082	-0.7655	0.7482	0.9491	1.0427	0.2691	2.7309	1.0994	-1.1795	-0.8495
lihc_tcga_pan_can_atlas_2018	TCGA-DD-AACT-01	2.5264	-0.4789	0.2546	-1.2292	-1.3231	-1.0237	2.9221	-1.2522	-0.5084	-0.8182
lihc_tcga_pan_can_atlas_2018	TCGA-DD-AACU-01	-0.202	-0.2466	-1.4106	0.2784	1.1678	0.1179	0.3271	0.4324	1.0845	-0.0468
lihc_tcga_pan_can_atlas_2018	TCGA-DD-AACV-01	0.7558	0.4559	1.8071	2.9803	1.8211	1.8925	1.6401	0.7302	0.414	2.4071
lihc_tcga_pan_can_atlas_2018	TCGA-DD-AACW-01	2.182	0.7717	-1.3726	0.5169	0.3598	0.2833	6.9601	0.2648	-1.0325	2.3029
lihc_tcga_pan_can_atlas_2018	TCGA-DD-AACX-01	0.5744	-0.1686	-0.1361	1.1795	0.6821	-0.2251	0.3243	-0.1381	-0.3854	0.0643
lihc_tcga_pan_can_atlas_2018	TCGA-DD-AACY-01	1.9024	0.0861	-1.7663	-0.2751	-0.0185	-0.5181	1.0651	-0.6218	-0.452	0.0069
lihc_tcga_pan_can_atlas_2018	TCGA-DD-AACZ-01	1.7517	2.3421	0.9945	0.0436	0.652	1.5892	2.1969	0.6667	2.1964	0.9668
lihc_tcga_pan_can_atlas_2018	TCGA-DD-AAD0-01	1.7017	0.68	-1.6145	-0.2577	-0.3615	0.1673	1.9439	0.7754	-0.6054	-0.8436
lihc_tcga_pan_can_atlas_2018	TCGA-DD-AAD1-01	1.2957	-0.4269	0.0251	-0.4098	1.5738	0.5248	1.5859	1.301	-1.282	1.318
lihc_tcga_pan_can_atlas_2018	TCGA-DD-AAD2-01	-0.441	-0.2974	-0.223	-0.2746	-0.0116	-0.5229	0.9287	-0.4359	-0.3308	-0.4985
lihc_tcga_pan_can_atlas_2018	TCGA-DD-AAD3-01	-0.0212	-0.4576	-1.0685	-0.4307	0.3795	-0.0149	1.2627	-0.5319	-0.551	-0.966
lihc_tcga_pan_can_atlas_2018	TCGA-DD-AAD5-01	3.012	2.7415	0.5048	2.6477	0.2066	0.4598	0.1347	-1.4158	0.6809	-0.5005
lihc_tcga_pan_can_atlas_2018	TCGA-DD-AAD6-01	2.7341	-0.6401	1.1012	2.0223	-1.6983	0.2779	-1.0901	-0.4067	0.9691	-1.2111
lihc_tcga_pan_can_atlas_2018	TCGA-DD-AAD8-01	1.497	-1.2476	-0.1649	0.2904	0.3076	0.4592	-0.3749	-0.2008	0.1284	-0.2536
lihc_tcga_pan_can_atlas_2018	TCGA-DD-AADA-01	7.8523	-0.5785	0.193	-0.9356	-0.6317	0.0087	3.9862	-0.1347	-0.3653	-0.4832
lihc_tcga_pan_can_atlas_2018	TCGA-DD-AADB-01	1.8594	0.6882	0.8884	-0.0083	1.391	1.0929	1.6552	1.1227	0.3444	2.7293
lihc_tcga_pan_can_atlas_2018	TCGA-DD-AADC-01	2.4309	3.6499	0.6207	3.289	0.1001	4.8589	-0.4164	0.9852	-0.201	2.0548
lihc_tcga_pan_can_atlas_2018	TCGA-DD-AADD-01	3.4961	0.6428	0.8077	1.3904	0.066	1.0735	6.4924	1.242	-1.0921	1.0892
lihc_tcga_pan_can_atlas_2018	TCGA-DD-AADF-01	-0.5099	-0.5349	-0.783	5.0664	-1.1382	-0.9287	-1.0644	-0.8775	3.1179	0.6121
lihc_tcga_pan_can_atlas_2018	TCGA-DD-AADG-01	1.7664	-0.145	-1.5006	1.2269	-0.6038	-0.5862	1.8875	0.6211	1.0392	-0.76
lihc_tcga_pan_can_atlas_2018	TCGA-DD-AADI-01	1.5961	0.3055	-0.9075	0.8216	-0.8344	-0.7989	5.2749	-0.8997	0.4796	-0.5554
lihc_tcga_pan_can_atlas_2018	TCGA-DD-AADJ-01	0.0557	-0.4375	-1.3706	-0.3177	-0.3919	-1.2585	2.5424	-1.0524	-0.2612	1.8181
lihc_tcga_pan_can_atlas_2018	TCGA-DD-AADK-01	2.5659	-0.0147	-1.3645	-0.3112	-0.9088	-0.0472	1.2797	-0.8694	1.1536	0.053
lihc_tcga_pan_can_atlas_2018	TCGA-DD-AADL-01	0.5734	-0.2966	-0.3903	0.2813	0.0678	0.6216	1.2736	0.2278	-0.1268	-0.0867
lihc_tcga_pan_can_atlas_2018	TCGA-DD-AADM-01	0.1767	-0.1822	-0.4217	0.4828	-1.1403	-1.0198	3.1211	-1.2089	0.603	0.6272
lihc_tcga_pan_can_atlas_2018	TCGA-DD-AADN-01	-2.1076	0.7135	0.3334	1.2639	-2.2609	-1.1309	-0.082	-0.9363	5.3205	1.0919
lihc_tcga_pan_can_atlas_2018	TCGA-DD-AADO-01	-1.5428	0.0904	0.6621	1.7822	-2.4433	-1.4837	1.1707	-1.0707	0.2254	0.19
lihc_tcga_pan_can_atlas_2018	TCGA-DD-AADP-01	4.6835	-0.5325	-1.3872	-0.515	-1.3411	-0.1348	2.4805	0.4118	-1.0598	0.1016
lihc_tcga_pan_can_atlas_2018	TCGA-DD-AADQ-01	0.1001	0.3187	-0.9949	-0.9273	-0.9963	0.3386	-1.3997	-0.7029	1.6444	0.4812
lihc_tcga_pan_can_atlas_2018	TCGA-DD-AADR-01	1.1554	1.6357	-1.3373	0.3164	-0.8082	1.0917	-0.1693	-0.5098	0.135	1.9463
lihc_tcga_pan_can_atlas_2018	TCGA-DD-AADS-01	-2.3922	-0.9305	-1.9393	-0.6097	-2.1549	-1.944	-0.7735	-1.439	-0.2214	-1.4845
lihc_tcga_pan_can_atlas_2018	TCGA-DD-AADU-01	2.8452	-0.4166	-0.5225	-0.9773	-1.5244	-1.3399	-0.0826	-1.2021	1.3153	-1.0785
lihc_tcga_pan_can_atlas_2018	TCGA-DD-AADV-01	1.4984	0.2675	-0.457	-0.0742	0.726	1.6257	2.7572	0.4359	0.0353	-0.4387
lihc_tcga_pan_can_atlas_2018	TCGA-DD-AADW-01	3.4731	-0.2402	-0.6461	3.9068	0.0485	0.9369	2.7162	2.6669	-0.8151	0.2761
lihc_tcga_pan_can_atlas_2018	TCGA-DD-AADY-01	6.3011	-1.3602	-0.8644	-0.3622	1.7218	0.9274	6.8657	1.8018	-1.9566	0.6649
lihc_tcga_pan_can_atlas_2018	TCGA-DD-AAE0-01	1.4135	0.9141	3.8295	2.1536	-0.9911	0.0345	2.5841	-0.8557	0.5276	0.4439
lihc_tcga_pan_can_atlas_2018	TCGA-DD-AAE1-01	3.121	0.3079	-0.229	0.2803	-0.3251	0.8197	4.5328	-0.3134	-0.7356	1.5832
lihc_tcga_pan_can_atlas_2018	TCGA-DD-AAE2-01	0.1297	-0.4178	-1.1242	0.9322	1.0744	-0.2119	-0.1852	0.25	1.2667	-1.4817
lihc_tcga_pan_can_atlas_2018	TCGA-DD-AAE3-01	-1.4243	-0.5015	-2.175	1.8221	-1.8777	-1.1026	-0.4617	-1.1878	2.7992	-0.992
lihc_tcga_pan_can_atlas_2018	TCGA-DD-AAE4-01	-1.4504	0.1429	-0.9931	1.2249	-1.1585	-0.8687	0.7387	-1.2914	0.279	-0.4711
lihc_tcga_pan_can_atlas_2018	TCGA-DD-AAE6-01	0.1333	0.1392	0.7196	0.2963	-0.1112	-0.4045	1.1408	-1.0991	1.4905	-1.3417
lihc_tcga_pan_can_atlas_2018	TCGA-DD-AAE7-01	0.3163	-1.131	-0.5458	-1.0659	-0.0161	-0.827	0.9032	-0.4974	0.5142	-0.0126
lihc_tcga_pan_can_atlas_2018	TCGA-DD-AAE9-01	2.5402	-0.3414	-1.7968	-1.5369	-1.6977	-0.5596	0.3512	-1.0229	3.0362	0.7532
lihc_tcga_pan_can_atlas_2018	TCGA-DD-AAEA-01	1.7797	-0.3076	0.2584	-0.0887	0.9107	-0.2617	-1.6124	-0.7367	0.3756	-0.7431
lihc_tcga_pan_can_atlas_2018	TCGA-DD-AAEB-01	-0.0003	-0.4652	-1.1184	-0.6439	-1.3718	-1.172	0.2759	-0.6061	-0.071	-1.1404
lihc_tcga_pan_can_atlas_2018	TCGA-DD-AAED-01	3.1241	-1.5506	0.6035	-0.3402	-0.5804	0.6762	-0.1951	0.2317	-1.1414	2.2438
lihc_tcga_pan_can_atlas_2018	TCGA-DD-AAEE-01	0.3503	0.6266	-1.1839	1.0389	-0.1466	0.076	-0.2768	-0.2743	3.31	-0.6957
lihc_tcga_pan_can_atlas_2018	TCGA-DD-AAEG-01	6.691	-0.0131	-1.0128	-1.1198	-0.6731	-0.3299	2.422	-0.5067	0.4049	-1.2515
lihc_tcga_pan_can_atlas_2018	TCGA-DD-AAEH-01	1.2539	0.1571	-1.8235	-1.2314	-0.1812	-0.5709	-0.1631	-0.8002	-0.927	0.7174
lihc_tcga_pan_can_atlas_2018	TCGA-DD-AAEI-01	-0.9409	-0.0821	-0.7032	-0.3385	-0.1663	0.8114	-1.1068	-0.1178	0.6797	-0.6821
lihc_tcga_pan_can_atlas_2018	TCGA-DD-AAEK-01	0.7006	-0.7094	-0.8177	0.6186	-0.6877	-0.1392	1.1871	-0.4115	-1.072	-0.7885
lihc_tcga_pan_can_atlas_2018	TCGA-DD-AAVP-01	-0.0746	0.531	-0.0061	-0.619	-0.6117	-0.5641	1.3898	-0.6043	3.6149	1.0111
lihc_tcga_pan_can_atlas_2018	TCGA-DD-AAVQ-01	1.8314	0.9968	-0.6369	1.201	0.2247	0.0677	3.9075	-0.2502	-0.3534	1.7033
lihc_tcga_pan_can_atlas_2018	TCGA-DD-AAVR-01	1.477	0.0984	-0.6166	-0.4131	-0.5938	0.0095	3.0409	-0.5221	0.4772	0.6004
lihc_tcga_pan_can_atlas_2018	TCGA-DD-AAVS-01	1.7154	-0.058	-1.146	-0.5801	1.1446	0.0381	4.1996	0.7385	-0.9923	0.0907
lihc_tcga_pan_can_atlas_2018	TCGA-DD-AAVU-01	-1.2173	-0.5266	-1.1464	1.7294	-1.1336	-1.5871	0.1399	-1.1823	0.2835	0.246
lihc_tcga_pan_can_atlas_2018	TCGA-DD-AAVV-01	3.6195	-0.2625	0.2736	0.1919	-0.9212	0.0507	4.5328	-0.8888	0.4058	-0.4795
lihc_tcga_pan_can_atlas_2018	TCGA-DD-AAVW-01	2.5664	-0.4465	-0.0976	-0.9766	0.3382	0.0921	1.6242	-0.1193	-0.8957	-0.2014
lihc_tcga_pan_can_atlas_2018	TCGA-DD-AAVX-01	-1.1376	-0.821	-0.9203	-0.3169	-0.7375	0.3175	-0.1492	-0.4444	-0.5781	-0.319
lihc_tcga_pan_can_atlas_2018	TCGA-DD-AAVY-01	2.9966	-0.9893	-1.8119	-0.8015	-0.0416	-0.3088	3.3538	-0.1069	-0.5696	-0.6803
lihc_tcga_pan_can_atlas_2018	TCGA-DD-AAVZ-01	5.1155	0.2805	0.0842	-0.2073	1.9663	0.2217	5.3852	1.0936	-0.7297	1.624
lihc_tcga_pan_can_atlas_2018	TCGA-DD-AAW0-01	3.3147	-0.9994	-1.0188	-0.4908	0.3948	-0.0821	1.7948	-0.1023	-1.2386	0.397
lihc_tcga_pan_can_atlas_2018	TCGA-DD-AAW1-01	2.9542	-0.5182	-1.4464	0.3163	0.2206	-0.3107	1.8032	2.1489	0.2549	-0.4997
lihc_tcga_pan_can_atlas_2018	TCGA-DD-AAW2-01	2.7305	-0.5439	-1.4811	-0.6349	0.1344	0.0083	3.8668	0.3948	0.002	-0.4078
lihc_tcga_pan_can_atlas_2018	TCGA-DD-AAW3-01	2.3723	-0.0816	-1.313	-1.0241	-0.1141	0.1552	1.7422	0.1292	-0.4817	0.213
lihc_tcga_pan_can_atlas_2018	TCGA-ED-A459-01	2.8866	0.182	0.2374	0.3533	-0.0065	1.0002	0.8278	0.3919	1.2183	-1.1525
lihc_tcga_pan_can_atlas_2018	TCGA-ED-A4XI-01	0.599	-0.5512	-0.6138	-0.4549	0.4185	-0.1966	1.5061	0.0564	-1.2047	-0.9635
lihc_tcga_pan_can_atlas_2018	TCGA-ED-A5KG-01	2.0273	0.5786	-0.6201	0.5242	1.0749	0.5835	3.7774	1.6879	-1.6068	-0.1178
lihc_tcga_pan_can_atlas_2018	TCGA-ED-A627-01	-0.2665	-0.7828	-0.6322	-0.5988	0.569	-0.4254	0.127	-0.1155	-0.6537	-0.2413
lihc_tcga_pan_can_atlas_2018	TCGA-ED-A66X-01	3.7047	-0.2907	0.8826	1.5633	0.9073	-0.0702	5.0004	1.0482	-0.8703	5.6946
lihc_tcga_pan_can_atlas_2018	TCGA-ED-A66Y-01	3.2618	0.0766	1.9776	2.0522	1.195	0.4709	2.6562	2.3693	-1.6385	-0.0515
lihc_tcga_pan_can_atlas_2018	TCGA-ED-A7PX-01	0.0016	2.5991	-0.373	0.7668	0.2832	1.4352	0.6252	0.2169	-0.6559	-1.2304
lihc_tcga_pan_can_atlas_2018	TCGA-ED-A7PY-01	5.631	-0.6235	0.3969	-0.3434	-0.1163	-0.048	3.9399	0.317	-1.3494	-0.358
lihc_tcga_pan_can_atlas_2018	TCGA-ED-A7PZ-01	0.6685	2.7758	-0.5242	3.4134	-0.1999	0.9812	2.5337	-1.166	2.0362	0.1503
lihc_tcga_pan_can_atlas_2018	TCGA-ED-A7XO-01	0.0509	0.1128	-0.3408	1.4552	0.0324	0.7625	0.3845	-0.5471	1.7881	-1.3841
lihc_tcga_pan_can_atlas_2018	TCGA-ED-A7XP-01	6.6482	-0.672	0.8367	0.0321	0.9146	0.0529	3.5705	-0.1172	1.009	-0.3284
lihc_tcga_pan_can_atlas_2018	TCGA-ED-A82E-01	0.1693	-0.7931	-0.7161	-0.5094	0.1823	-0.4573	2.9111	0.2378	-1.8719	-0.8793
lihc_tcga_pan_can_atlas_2018	TCGA-ED-A8O5-01	2.7096	0.1096	-0.8984	0.158	-0.3836	0.4417	4.9051	1.5221	-1.377	2.1565
lihc_tcga_pan_can_atlas_2018	TCGA-ED-A8O6-01	1.7661	-0.084	-0.1459	1.0177	-0.3631	-0.1787	1.9165	0.1218	-0.8559	-1.4907
lihc_tcga_pan_can_atlas_2018	TCGA-ED-A97K-01	0.7912	-0.601	-0.4437	-1.1488	1.1904	-0.6302	1.4239	1.4516	-1.0614	0.0468
lihc_tcga_pan_can_atlas_2018	TCGA-EP-A12J-01	5.7469	-0.2687	-1.3286	-1.2623	0.3619	-0.3716	1.8288	2.3497	-0.7773	-0.6422
lihc_tcga_pan_can_atlas_2018	TCGA-EP-A26S-01	1.6343	0.5407	-1.0399	-0.0858	1.011	-0.3775	3.7648	0.5405	0.3182	0.7717
lihc_tcga_pan_can_atlas_2018	TCGA-EP-A2KA-01	3.358	0.2937	-0.693	0.8588	-1.2101	5.6837	0.9122	-1.0572	0.3802	-0.7712
lihc_tcga_pan_can_atlas_2018	TCGA-EP-A2KB-01	1.3987	0.4365	1.6856	1.0221	-0.2366	0.2386	6.687	0.1184	-1.361	0.8947
lihc_tcga_pan_can_atlas_2018	TCGA-EP-A2KC-01	2.0608	-0.5136	1.3418	1.7746	-1.1017	-0.308	2.1673	-0.4654	-0.6958	-0.0798
lihc_tcga_pan_can_atlas_2018	TCGA-EP-A3JL-01	1.6312	0.8388	-1.0434	-0.832	-1.3047	-0.1778	1.8573	-1.1791	-0.0132	1.4604
lihc_tcga_pan_can_atlas_2018	TCGA-EP-A3RK-01	3.3266	1.2274	-1.1584	1.0025	-0.327	0.657	3.3417	0.1098	2.762	0.2919
lihc_tcga_pan_can_atlas_2018	TCGA-ES-A2HS-01	-1.8541	-1.0682	-1.101	1.0436	-2.4792	-1.4729	-0.9585	-1.6244	0.951	-2.1159
lihc_tcga_pan_can_atlas_2018	TCGA-ES-A2HT-01	-0.7276	-0.8365	-1.3826	-0.8678	-1.1658	-1.3435	1.6291	-1.6798	0.8369	-1.3696
lihc_tcga_pan_can_atlas_2018	TCGA-FV-A23B-01	2.627	-0.2945	-1.523	3.8554	0.3824	-0.2033	3.2515	1.4313	-0.6534	0.0911
lihc_tcga_pan_can_atlas_2018	TCGA-FV-A2QQ-01	1.6997	-1.1364	-0.4665	-0.4204	-0.7531	-0.6172	1.0902	-0.935	0.7089	1.7833
lihc_tcga_pan_can_atlas_2018	TCGA-FV-A2QR-01	1.8241	-0.2906	-1.8093	1.0482	-1.0132	-0.566	2.2153	-0.6931	0.9235	-0.4232
lihc_tcga_pan_can_atlas_2018	TCGA-FV-A3I0-01	-0.599	-0.0292	0.1463	-0.7534	-0.298	0.6072	1.2868	-0.0172	-0.5298	-0.9169
lihc_tcga_pan_can_atlas_2018	TCGA-FV-A3I1-01	1.0291	0.0042	-0.061	-0.2528	0.4371	0.0026	1.6513	0.2568	0.2732	0.1931
lihc_tcga_pan_can_atlas_2018	TCGA-FV-A3R2-01	-0.1844	-0.8289	-1.525	-1.0627	0.0014	-0.5636	-0.4718	-0.4208	0.8946	-0.1098
lihc_tcga_pan_can_atlas_2018	TCGA-FV-A3R3-01	1.5991	-0.9281	-0.5223	-1.0693	0.7287	-0.8022	2.3462	0.043	-0.9558	-1.1309
lihc_tcga_pan_can_atlas_2018	TCGA-FV-A495-01	-1.7068	-0.1045	0.1236	2.7345	-1.9749	-0.9816	0.3599	-1.1564	0.5363	-1.8237
lihc_tcga_pan_can_atlas_2018	TCGA-FV-A496-01	1.5849	-0.8199	0.9292	1.58	-1.0199	-0.0629	0.7502	-0.6154	-0.0778	-0.303
lihc_tcga_pan_can_atlas_2018	TCGA-FV-A4ZP-01	-2.5898	-1.0481	-0.4508	1.8166	-2.4189	-2.0445	-2.5588	-1.8693	1.1724	-1.076
lihc_tcga_pan_can_atlas_2018	TCGA-FV-A4ZQ-01	-0.2168	2.5443	3.1922	0.2397	1.2385	1.1158	0.9302	2.4294	0.8463	0.0738
lihc_tcga_pan_can_atlas_2018	TCGA-G3-A25S-01	0.4163	0.3746	-1.2839	3.2652	0.501	-0.405	0.3384	-0.4417	3.9705	-1.075
lihc_tcga_pan_can_atlas_2018	TCGA-G3-A25T-01	-1.2763	1.0055	-0.382	1.5829	-1.585	-0.361	-0.2038	-1.2295	-0.0318	-0.834
lihc_tcga_pan_can_atlas_2018	TCGA-G3-A25U-01	-1.5581	-0.3337	-0.5277	3.2495	2.4746	0.2554	-1.8607	1.143	0.1139	-0.4967
lihc_tcga_pan_can_atlas_2018	TCGA-G3-A25V-01	-1.0659	-0.6904	-1.2506	0.0877	-0.615	-0.6027	-0.5581	-1.1387	1.0753	-0.4036
lihc_tcga_pan_can_atlas_2018	TCGA-G3-A25X-01	-0.7699	3.2382	-1.3986	2.3397	-1.5991	-0.2527	0.802	-1.6194	1.2851	-1.8453
lihc_tcga_pan_can_atlas_2018	TCGA-G3-A25Y-01	0.7007	-0.0231	-0.5969	2.3429	0.5535	0.994	0.4171	0.617	0.4317	0.0539
lihc_tcga_pan_can_atlas_2018	TCGA-G3-A25Z-01	-0.2439	0.2977	-0.5807	1.6985	-0.6855	-0.2926	-0.8784	-0.6688	0.4971	0.7511
lihc_tcga_pan_can_atlas_2018	TCGA-G3-A3CH-01	0.5848	-0.4264	-0.7037	0.6248	0.3767	-0.4117	-1.0309	0.9701	-1.2094	0.269
lihc_tcga_pan_can_atlas_2018	TCGA-G3-A3CI-01	-0.2236	-0.9355	-0.4882	-0.9292	-0.0553	0.9019	-1.0683	-1.0565	-0.0679	-0.2662
lihc_tcga_pan_can_atlas_2018	TCGA-G3-A3CJ-01	1.6352	-0.0924	-2.2705	-0.6008	-0.9947	-1.1934	2.6985	-1.4657	-0.2479	-0.6324
lihc_tcga_pan_can_atlas_2018	TCGA-G3-A3CK-01	2.1767	0.1534	-1.4464	-0.065	0.5002	-0.2877	2.173	0.1844	0.3521	-0.2076
lihc_tcga_pan_can_atlas_2018	TCGA-G3-A5SI-01	1.0617	-0.437	0.2661	3.6455	0.3014	-0.3141	1.3123	0.5959	0.1616	-0.4829
lihc_tcga_pan_can_atlas_2018	TCGA-G3-A5SJ-01	-0.4758	0.6398	-0.4428	3.2628	-1.9415	0.8089	0.1559	-0.8465	1.3943	0.9064
lihc_tcga_pan_can_atlas_2018	TCGA-G3-A5SK-01	1.5944	-0.9589	-0.6192	-1.2417	1.572	-0.8581	1.5187	-0.5365	-1.2865	0.2659
lihc_tcga_pan_can_atlas_2018	TCGA-G3-A5SL-01	5.349	-1.0612	-1.9785	0.3126	-0.2697	-0.5664	1.3674	0.4504	-0.1129	-0.2563
lihc_tcga_pan_can_atlas_2018	TCGA-G3-A5SM-01	1.3594	0.0551	-0.0959	-0.0451	-0.0019	-0.2911	1.8738	-0.4543	-0.0163	-0.5339
lihc_tcga_pan_can_atlas_2018	TCGA-G3-A6UC-01	2.0109	-0.4412	-1.5625	-1.1204	1.0418	-0.4778	2.9726	0.3197	-0.6908	-0.7335
lihc_tcga_pan_can_atlas_2018	TCGA-G3-A7M5-01	0.0532	-0.3161	-1.5764	0.4109	0.2541	-0.5426	0.1741	-0.411	-0.7656	-0.3415
lihc_tcga_pan_can_atlas_2018	TCGA-G3-A7M6-01	1.2206	0.0126	1.2489	2.6969	-0.5356	0.989	3.4845	1.3217	-0.8992	0.1626
lihc_tcga_pan_can_atlas_2018	TCGA-G3-A7M7-01	-1.3412	-0.6613	-1.0517	-0.4012	-1.0458	-0.9482	-1.4476	-1.0596	-0.1634	-0.3772
lihc_tcga_pan_can_atlas_2018	TCGA-G3-A7M8-01	-0.682	-0.8633	-1.4301	-0.2656	-0.329	-0.6119	-0.7113	-0.4811	1.0481	-1.5821
lihc_tcga_pan_can_atlas_2018	TCGA-G3-A7M9-01	3.315	5.4538	2.9215	0.8152	0.9822	5.5257	4.4795	1.9091	0.5376	2.2032
lihc_tcga_pan_can_atlas_2018	TCGA-G3-AAUZ-01	-1.4541	-0.7125	-1.2992	2.7816	-1.4252	-0.9311	-1.4	-1.0761	-0.2944	-1.42
lihc_tcga_pan_can_atlas_2018	TCGA-G3-AAV0-01	-0.3067	-1.0791	-1.0596	-0.5124	-1.3429	-0.9578	-1.2945	-1.282	0.0169	-1.3087
lihc_tcga_pan_can_atlas_2018	TCGA-G3-AAV1-01	1.6847	0.0629	-1.1662	1.5282	-0.1277	1.9468	1.8244	0.4954	3.5366	0.2872
lihc_tcga_pan_can_atlas_2018	TCGA-G3-AAV2-01	6.0346	0.2492	-0.8452	-0.3142	-0.3756	-0.5322	3.1207	0.192	3.586	-1.1009
lihc_tcga_pan_can_atlas_2018	TCGA-G3-AAV3-01	0.6945	1.4656	-1.6878	0.0265	-0.0425	0.0906	1.5743	1.0867	2.9156	-0.7784
lihc_tcga_pan_can_atlas_2018	TCGA-G3-AAV4-01	-0.1576	1.8067	-1.0719	0.1391	0.1617	0.733	1.3238	3.4446	0.937	-0.0288
lihc_tcga_pan_can_atlas_2018	TCGA-G3-AAV5-01	2.497	0.2247	-0.5441	0.6595	-0.8451	-1.1092	1.638	-1.0408	0.5285	1.11
lihc_tcga_pan_can_atlas_2018	TCGA-G3-AAV6-01	0.8929	2.4306	0.0759	2.2473	-0.1965	1.1624	2.3777	0.1002	3.3317	-0.449
lihc_tcga_pan_can_atlas_2018	TCGA-G3-AAV7-01	5.6003	1.1563	1.3084	2.3118	-0.8177	2.5444	2.9289	-0.8876	0.6357	1.8343
lihc_tcga_pan_can_atlas_2018	TCGA-GJ-A3OU-01	0.6686	-0.1886	0.2521	-0.5819	-0.5021	0.1722	1.4586	-0.21	-0.6001	0.9017
lihc_tcga_pan_can_atlas_2018	TCGA-GJ-A6C0-01	0.0605	0.0028	-0.1223	2.5727	-0.1588	0.4977	-0.6751	-0.6024	-0.2717	-0.2373
lihc_tcga_pan_can_atlas_2018	TCGA-GJ-A9DB-01	0.0679	-1.1334	0.5129	-0.0003	0.7527	-0.2167	-0.0792	-0.1143	-0.6192	-1.038
lihc_tcga_pan_can_atlas_2018	TCGA-HP-A5MZ-01	0.7803	-0.7148	-0.4233	-0.6627	-1.3867	-0.4654	0.9172	-0.6677	-0.6325	-0.5054
lihc_tcga_pan_can_atlas_2018	TCGA-HP-A5N0-01	0.537	-0.4956	-0.9081	-0.6789	-0.9455	-0.436	1.5862	-0.6955	-0.3251	-1.0116
lihc_tcga_pan_can_atlas_2018	TCGA-K7-A5RF-01	-0.7282	-0.8971	-1.3675	-0.6341	0.0693	-1.0466	-0.4076	-0.3532	-0.6635	-0.4138
lihc_tcga_pan_can_atlas_2018	TCGA-K7-A5RG-01	0.7472	1.285	1.6672	1.1044	1.649	1.5622	2.2851	0.7906	0.1963	-0.7355
lihc_tcga_pan_can_atlas_2018	TCGA-K7-A6G5-01	-0.5529	-0.5889	-0.5011	-0.7699	-1.0172	-1.1914	-0.2796	-1.4334	0.5761	-1.2916
lihc_tcga_pan_can_atlas_2018	TCGA-K7-AAU7-01	-0.3527	1.0004	0.571	1.7338	0.2263	2.4605	0.5248	-0.279	-0.5858	1.2607
lihc_tcga_pan_can_atlas_2018	TCGA-KR-A7K0-01	2.9308	0.1691	0.3136	-0.0982	-0.8213	-0.0268	2.3302	-0.2481	0.252	-0.4473
lihc_tcga_pan_can_atlas_2018	TCGA-KR-A7K2-01	1.1983	-0.7154	0.6107	-0.8854	-0.9975	-0.9859	1.5279	-0.7678	-0.79	-0.043
lihc_tcga_pan_can_atlas_2018	TCGA-KR-A7K7-01	0.2182	1.442	0.4173	1.3836	-0.9691	-0.1235	1.3941	-1.0196	0.4377	-0.0062
lihc_tcga_pan_can_atlas_2018	TCGA-KR-A7K8-01	0.8343	-0.9574	0.0216	-0.1286	1.9107	-0.8089	0.9149	-1.294	0.3711	1.3942
lihc_tcga_pan_can_atlas_2018	TCGA-LG-A6GG-01	2.2238	-1.058	-0.2795	0.757	1.0905	-0.6384	2.3235	0.4616	-0.8543	-1.1274
lihc_tcga_pan_can_atlas_2018	TCGA-LG-A9QC-01	2.2477	0.054	-0.0474	1.1331	0.2258	-0.2886	1.1431	0.0607	-1.2388	0.4894
lihc_tcga_pan_can_atlas_2018	TCGA-LG-A9QD-01	-0.1072	-0.56	-0.8143	-1.7652	-0.5831	-0.8761	-1.2182	-0.7059	-0.256	0.3158
lihc_tcga_pan_can_atlas_2018	TCGA-MI-A75C-01	2.5764	1.4773	-0.4923	-0.7381	-0.8288	0.7953	0.6799	-1.1587	1.3057	0.4331
lihc_tcga_pan_can_atlas_2018	TCGA-MI-A75E-01	0.045	0.2108	-1.0694	-0.0283	-0.4416	-0.3849	0.3698	-0.9885	-0.2664	-0.4763
lihc_tcga_pan_can_atlas_2018	TCGA-MI-A75G-01	0.6559	-0.8848	-1.2015	-0.3567	-0.6251	-1.0302	0.0433	-1.0244	2.5228	-0.8575
lihc_tcga_pan_can_atlas_2018	TCGA-MI-A75H-01	2.6655	0.0815	-1.6861	-0.9383	-1.1376	-0.1256	-0.4454	0.4586	2.0339	0.1187
lihc_tcga_pan_can_atlas_2018	TCGA-MI-A75I-01	0.8152	0.1127	-0.9795	1.03	0.3511	-0.4358	-0.6074	-0.7749	0.7434	1.3882
lihc_tcga_pan_can_atlas_2018	TCGA-MR-A520-01	0.668	-0.9606	-0.6317	-0.3857	-0.4137	1.6822	-0.2147	-0.86	-0.1795	-0.5971
lihc_tcga_pan_can_atlas_2018	TCGA-MR-A8JO-01	0.4011	-0.5719	0.9598	-0.3184	0.3115	-0.9836	0.3586	-0.0308	-0.5961	-1.0815
lihc_tcga_pan_can_atlas_2018	TCGA-NI-A4U2-01	-0.1672	-1.0559	-0.4294	0.9766	-0.0735	-0.8795	-0.728	-1.0153	-0.4309	-1.0431
lihc_tcga_pan_can_atlas_2018	TCGA-NI-A8LF-01	0.0322	-1.5091	-1.1152	-0.4518	-0.4516	-0.329	-1.1706	-0.6113	1.5974	-0.5825
lihc_tcga_pan_can_atlas_2018	TCGA-O8-A75V-01	0.3404	-0.0876	-0.6252	0.9054	-0.4801	-0.2502	0.9597	-1.1206	-0.1948	-0.9612
lihc_tcga_pan_can_atlas_2018	TCGA-PD-A5DF-01	0.7317	0.5795	-0.1938	2.3023	-0.6621	1.8521	0.8869	-0.2035	1.1544	-0.8838
lihc_tcga_pan_can_atlas_2018	TCGA-QA-A7B7-01	2.8418	1.5459	3.0424	2.5505	1.7256	3.3798	4.6096	1.1911	4.4864	1.4331
lihc_tcga_pan_can_atlas_2018	TCGA-RC-A6M3-01	2.2382	0.5576	1.0299	1.16	0.0589	2.5404	0.1701	0.1521	1.6632	3.5547
lihc_tcga_pan_can_atlas_2018	TCGA-RC-A6M4-01	0.8812	-0.2776	-1.7958	0.5482	-0.5346	-0.3605	1.2555	-0.344	1.5839	-0.6101
lihc_tcga_pan_can_atlas_2018	TCGA-RC-A6M5-01	0.0124	-0.6268	-0.2949	-0.8328	0.523	-0.9081	1.6591	-0.5347	-0.5538	-2.0656
lihc_tcga_pan_can_atlas_2018	TCGA-RC-A6M6-01	0.3664	3.0842	-1.2447	3.3851	-0.0702	2.456	1.4973	-0.2161	1.5641	0.0699
lihc_tcga_pan_can_atlas_2018	TCGA-RC-A7S9-01	1.9412	-0.4554	0.4603	0.8982	-0.9971	-0.8999	0.562	-0.3114	-0.0628	-0.5633
lihc_tcga_pan_can_atlas_2018	TCGA-RC-A7SB-01	0.688	-0.3991	-0.7432	0.0299	-1.216	-0.0629	-0.1258	-0.8385	0.4701	-0.3292
lihc_tcga_pan_can_atlas_2018	TCGA-RC-A7SF-01	0.7887	-0.8964	0.0075	-0.3419	-0.915	-0.3897	-1.6555	-1.0273	-0.0861	-2.5941
lihc_tcga_pan_can_atlas_2018	TCGA-RC-A7SH-01	2.4806	-0.9116	1.2325	-0.4219	0.1891	-0.2802	2.6683	-0.8927	-1.1922	0.3572
lihc_tcga_pan_can_atlas_2018	TCGA-RC-A7SK-01	0.0842	-0.4098	0.3802	0.0025	-0.3106	-0.2233	-1.189	-0.9579	-0.1622	-1.721
lihc_tcga_pan_can_atlas_2018	TCGA-RG-A7D4-01	2.7568	3.8616	2.6251	4.681	-0.7947	2.676	4.5716	0.0199	0.2409	5.7648
lihc_tcga_pan_can_atlas_2018	TCGA-UB-A7MA-01	1.0998	0.6886	0.8995	2.9172	-1.3617	2.4948	1.6209	-0.3451	-1.2103	-2.3918
lihc_tcga_pan_can_atlas_2018	TCGA-UB-A7MB-01	-1.1669	-0.1823	0.858	2.318	-1.4387	-0.1644	-2.2147	1.3981	-0.2267	-2.6603
lihc_tcga_pan_can_atlas_2018	TCGA-UB-A7MC-01	5.1353	0.0284	4.0519	1.911	0.3773	0.9968	5.0231	-0.0858	-1.2574	-0.7897
lihc_tcga_pan_can_atlas_2018	TCGA-UB-A7MD-01	0.6328	-0.178	-0.1988	-0.1574	-0.1336	0.0431	1.4455	-0.7623	0.3157	-0.4226
lihc_tcga_pan_can_atlas_2018	TCGA-UB-A7ME-01	1.4599	0.53	-1.091	0.2477	0.6481	0.8974	2.9314	0.6132	1.213	-0.9223
lihc_tcga_pan_can_atlas_2018	TCGA-UB-A7MF-01	-0.3917	0.3733	0.1674	0.5572	-0.674	-0.4786	0.4987	0.2857	0.4799	-1.3372
lihc_tcga_pan_can_atlas_2018	TCGA-UB-AA0U-01	2.0384	-0.1068	0.7372	0.985	-0.1939	0.188	1.292	0.8129	-1.4097	-0.3932
lihc_tcga_pan_can_atlas_2018	TCGA-UB-AA0V-01	0.17	-0.8413	-0.3554	-0.7215	-0.1163	-0.2884	0.8659	0.4732	-1.1232	0.4344
lihc_tcga_pan_can_atlas_2018	TCGA-WJ-A86L-01	2.0019	-1.2173	0.6538	-1.1922	-0.9397	-0.7632	-0.5743	-0.3435	-1.768	1.5221
lihc_tcga_pan_can_atlas_2018	TCGA-WQ-A9G7-01	1.9321	-0.7144	1.1522	-0.485	0.691	-0.1204	0.2052	-0.4737	1.2407	2.019
lihc_tcga_pan_can_atlas_2018	TCGA-WQ-AB4B-01	0.2674	0.1781	-0.1292	-1.0146	-0.6816	-0.7108	-0.2408	-1.2642	0.7696	0.6106
lihc_tcga_pan_can_atlas_2018	TCGA-WX-AA44-01	3.2421	-0.8697	2.1765	-0.6874	-1.1724	-0.9368	1.8586	-0.1704	-1.5188	0.0458
lihc_tcga_pan_can_atlas_2018	TCGA-WX-AA46-01	0.2685	-0.746	-1.4648	-0.9243	0.6828	-0.5102	0.1996	0.0123	-0.5442	0.6564
lihc_tcga_pan_can_atlas_2018	TCGA-WX-AA47-01	0.7333	-0.4723	0.3649	-0.987	0.9949	-0.6612	-1.1105	-0.0597	0.2803	-1.8836
lihc_tcga_pan_can_atlas_2018	TCGA-XR-A8TD-01	-0.3427	-0.4175	2.1501	1.6303	-0.0082	-0.2193	-1.1592	-0.4084	0.2733	-0.7852
lihc_tcga_pan_can_atlas_2018	TCGA-XR-A8TE-01	1.2681	-0.2123	0.0701	-1.3813	0.4487	-0.6941	-0.6848	1.0761	2.0049	0.7686
lihc_tcga_pan_can_atlas_2018	TCGA-XR-A8TF-01	5.8813	-0.4955	-0.4893	1.2059	0.2971	0.6708	6.8637	0.2848	-1.6825	1.1696
lihc_tcga_pan_can_atlas_2018	TCGA-XR-A8TG-01	0.9429	-0.35	-0.173	-0.0991	1.9325	0.5402	0.0753	-0.0488	-0.1462	-0.5459
lihc_tcga_pan_can_atlas_2018	TCGA-YA-A8S7-01	0.2771	1.0463	1.3272	-0.8078	-0.2963	0.3687	-0.0497	-0.5182	0.9598	-1.1703
lihc_tcga_pan_can_atlas_2018	TCGA-ZP-A9CV-01	2.1642	-0.7552	-1.2339	-1.3587	0.3341	-0.8332	2.9165	-0.3234	-1.0095	0.2028
lihc_tcga_pan_can_atlas_2018	TCGA-ZP-A9CY-01	1.0366	-0.8036	-0.221	-0.1121	-0.2658	-0.2487	1.7033	-0.2941	-0.6335	-0.4425
lihc_tcga_pan_can_atlas_2018	TCGA-ZP-A9CZ-01	0.3941	0.6444	0.5146	3.282	-0.1975	0.0005	0.2685	0.4239	-0.2303	-0.5371
lihc_tcga_pan_can_atlas_2018	TCGA-ZP-A9D0-01	4.756	-0.721	-0.2347	-0.7269	1.1508	-0.4466	3.3659	0.7068	-0.9276	-0.4067
lihc_tcga_pan_can_atlas_2018	TCGA-ZP-A9D1-01	3.9717	-1.0532	-0.8029	-1.1043	0.3469	-0.5048	5.7557	0.4165	-1.519	2.5319
lihc_tcga_pan_can_atlas_2018	TCGA-ZP-A9D2-01	3.2562	0.9675	2.2547	0.2031	0.7597	0.9429	1.6273	0.612	0.78	0.4539
lihc_tcga_pan_can_atlas_2018	TCGA-ZP-A9D4-01	2.6193	-0.0828	-0.3699	2.2727	1.0737	-0.473	1.927	1.312	-0.948	0.4307
lihc_tcga_pan_can_atlas_2018	TCGA-ZS-A9CD-01	0.3052	-1.0384	-0.7419	-0.8669	-0.9553	-1.1093	-0.8055	-1.2218	-0.2403	-0.1045
lihc_tcga_pan_can_atlas_2018	TCGA-ZS-A9CE-01	1.0479	0.066	-0.4204	-0.1506	-0.7941	0.5043	0.6356	-0.7009	-1.2454	-1.5236
lihc_tcga_pan_can_atlas_2018	TCGA-ZS-A9CF-01	0.5247	-0.87	-0.8577	1.443	0.8605	0.0877	0.2616	0.5414	-0.9457	-1.1229
lihc_tcga_pan_can_atlas_2018	TCGA-ZS-A9CG-01	2.8991	-0.4343	-0.6999	-0.9761	-1.109	-0.7539	0.4843	0.5983	0.634	-1.7361
